# 1 Bacteriophages targeting *Acinetobacter baumannii* capsule 2 induce antimicrobial resensitization

3  
4 Fernando Gordillo Altamirano<sup>1\*</sup>, John H. Forsyth<sup>1</sup>, Ruzeen Patwa<sup>1</sup>, Xenia Kostoulas<sup>2</sup>, Michael Trim<sup>1</sup>, Dinesh  
5 Subedi<sup>1</sup>, Stuart Archer<sup>3</sup>, Faye C. Morris<sup>2</sup>, Cody Oliveira<sup>1</sup>, Luisa Kielty<sup>1</sup>, Denis Korneev<sup>1</sup>, Moira K. O'Bryan<sup>1</sup>,  
6 Trevor J. Lithgow<sup>2</sup>, Anton Y. Peleg<sup>2,4</sup>, Jeremy J. Barr<sup>1\*</sup>

7  
8 <sup>1</sup> School of Biological Sciences, Monash University

9 <sup>2</sup> Biomedicine Discovery Institute and Department of Microbiology, Monash University

10 <sup>3</sup> Monash Bioinformatics Platform, Faculty of Medicine, Nursing and Health Sciences, Monash University

11 <sup>4</sup> Department of Infectious Diseases, The Alfred Hospital and Central Clinical School, Monash University

12  
13 \*Corresponding authors

14 Fernando Gordillo Altamirano fernando.gordilloaltamirano@monash.edu

15 Jeremy J. Barr jeremy.barr@monash.edu

16 School of Biological Sciences, Monash University

17 25 Rainforest Walk,

18 Clayton, 3800, VIC

19 Australia

## 21 Abstract

22 Carbapenem-resistant *Acinetobacter baumannii* is responsible for frequent, hard-to-treat and often fatal  
23 healthcare-associated infections. Phage therapy, the use of viruses that infect and kill bacteria, is an approach  
24 gaining significant clinical interest to combat antibiotic-resistant infections. However, a major limitation is that  
25 bacteria can develop resistance against phages. Here, we isolated phages with activity against a panel of *A.*  
26 *baumannii* strains and focused on clinical isolates AB900 and A9844 and their phages for detailed  
27 characterization. As expected, coincubation of the phages with their hosts *in vitro* resulted in the emergence of  
28 phage-resistant bacterial mutants. Genome sequence analysis revealed that phage-resistant mutants harbored  
29 loss-of-function mutations in genes from the K locus, responsible for the biosynthesis of the bacterial capsule.  
30 Using molecular biology techniques, phage adsorption assays, and quantitative evaluation of capsule  
31 production, we established that the bacterial capsule serves as the primary receptor for these phages. As a  
32 collateral phenotype of impaired capsule production, the phage-resistant strains could not form biofilms, became  
33 fully sensitized to the human complement system, showed increased susceptibility to beta-lactam antibiotics,  
34 and became vulnerable to additional phages. Finally, in a murine model of bacteremia, the phage-resistant *A.*  
35 *baumannii* demonstrated a diminished capacity to colonize blood and solid tissues. This study demonstrates  
36 that phages can be used not only for their lytic activity but, if combined with *a posteriori* knowledge of their  
37 receptors and the mechanism of bacterial resistance, for their potential synergy with other antimicrobial agents,  
38 thus providing even broader clinical options for phage therapy.

## 40 Keywords

41 Phage therapy, *Acinetobacter baumannii*, bacterial capsule, phage receptors, antimicrobial resistance.

42

## 43 Introduction

44 In 2019, antimicrobial resistance was listed by the World Health Organization (WHO) as one of the top  
45 ten threats to global health (1). Multidrug resistant (MDR) infections are consistently associated with poor clinical  
46 outcomes and represent a significant financial burden on the healthcare system (2, 3). Also in 2019, the WHO  
47 and Centers for Disease Control and Prevention (CDC) prioritized carbapenem-resistant *Acinetobacter*  
48 *baumannii* as a pathogen critically requiring research and development of new antimicrobial strategies (4, 5).  
49 *A. baumannii*, a gram-negative coccobacillus, is a member of the *ESKAPE* group of pathogens, which are  
50 prominent for causing frequent and hard-to-treat healthcare-associated infections (6).

51 As a species, *A. baumannii* is highly resilient, and capable of surviving for months in biofilms on abiotic  
52 surfaces (7, 8). It can cause pneumonia, bacteremia, urinary tract infections, meningitis and wound infections,  
53 particularly in the context of intensive care units, and is frequently associated with indwelling medical devices  
54 (8). Previous studies have estimated *A. baumannii* to be the causative agent of up to 20% of infections within  
55 intensive care units worldwide (9). The pathogenicity of *A. baumannii* is facilitated by features of the bacterial  
56 cell surface, including secretion of an extracellular polysaccharide capsule, outer membrane proteome, and iron  
57 acquisition systems (10, 11). The extracellular capsule is of particular importance, given that it is an essential  
58 feature for biofilm formation (12), which in turn protects *A. baumannii* from the immune system, antibiotics and  
59 disinfectants (13, 14), and increases the risk of co-colonization with other pathogens (15). The capsule also  
60 allows the pathogen to escape the action of antibodies and complement-mediated killing, promotes intrinsic  
61 antimicrobial-resistant phenotypes, and increases virulence (16).

62 Bacteriophages (phages) are viruses that infect and kill bacteria, making them an attractive option to  
63 combat antimicrobial resistance (17). Phage therapy is the administration of phages directly to a patient with  
64 the purpose of lysing the underlying bacterial pathogen (18). Since phages are highly species-specific, phage  
65 therapy has a favorable safety profile and does not disturb the microbiome in the way antibiotics do. However,  
66 this also means that both diagnosis of the infection and identification of the etiological agent are required to  
67 generate a precise phage-host match that will maximize treatment effectiveness (17). Under these  
68 circumstances, it is useful to establish and expand collections of well-characterized phages against problematic  
69 pathogens such as *A. baumannii*. Phage therapy has shown promising results against *A. baumannii* in murine  
70 models of pneumonia (19), bacteremia (20) and wound infections (21). And in 2017, the first case of successful  
71 intravenous and intracavitary phage therapy targeting a systemic MDR infection was reported in the United  
72 States (22), involving a 68-year-old diabetic patient with necrotizing pancreatitis complicated by an MDR *A.*  
73 *baumannii* infection that was treated with successive administration of phage cocktails (22).

74 Phage specificity is regarded as a major limitation to making phage therapy more accessible. The  
75 primary determinant for phage specificity occurs during the first step of the phage infection cycle, which is the  
76 adsorption of the phage to its receptor on the bacterial cell surface. In the case of *A. baumannii*, the cell surface  
77 comprises a range of structures composed both of proteins and polysaccharides (11). The first layer of this cell  
78 surface are the capsular polysaccharides and, in *A. baumannii*, more than forty distinct capsular polysaccharide  
79 structures have been chemically determined and more than a hundred diverse capsule types predicted based  
80 on genome sequence analysis (16, 23). Likewise, the outer membrane proteome in *A. baumannii* can vary  
81 greatly from strain to strain (11). Given that there is a current lack of serotyping to provide information on the  
82 capsule-type of *A. baumannii* clinical isolates, experimentally determining a precise host-phage match is an  
83 important issue.

84 Bacteria rapidly adapt to external pressures and can evolve resistance to antibiotics and phages alike.  
85 Lytic phages impart strong selective pressures on their hosts, and phage-resistant phenotypes can emerge in  
86 clinically-relevant timeframes (24). In particular, *in vitro* phage resistance often arises through the modification  
87 or loss of surface receptors used during phage adsorption (25). This can result in the loss of the physiological  
88 function of the receptor, with a collateral reduction in bacterial fitness, often referred to as a ‘trade-off’ (26, 27).  
89 Trade-offs have been documented in various species and include decreased growth and impaired production  
90 of capsules in *Staphylococcus aureus* (28), loss of virulence in *Salmonella enterica* (29), and resensitization to  
91 antibiotics in *Pseudomonas aeruginosa* (30). Understanding phage-resistance mechanisms and their  
92 associated trade-offs can allow for their clinical exploitation, opening the door to the next generation of phage  
93 therapy.

94 In this study, we isolated and characterized novel phages active against clinical isolates of *A.*  
95 *baumannii*, including carbapenem-resistant isolates, to establish a phage library against this species. Upon  
96 examination of lytic phage activity, we observed that phage-resistant mutants quickly emerged *in vitro*. Using  
97 next-generation sequencing and bacterial genomics, we identified mutations in the genes associated with  
98 capsule production and confirmed that they were causative for the phage-resistant phenotypes. We used  
99 genetic engineering and phage adsorption assays to identify the capsule of *A. baumannii* as the primary phage  
100 receptor, and established that phage-resistance emerged through loss of this receptor and subsequent lack of  
101 phage adsorption. As a result, phage-resistant mutants exhibited altered capsule production, increased  
102 sensitivity to bactericidal agents, including human complement, antibiotics, and other phages, and reduced  
103 fitness in an *in vivo* bacteremia model. Here, we propose the use of phages, with *a posteriori* knowledge of their  
104 receptors, to enable both effective antimicrobial treatment and the informed prediction of phage-resistance  
105 outcomes, with exploitable fitness trade-offs extending the clinical impact of phage therapy.

106

## 107 Results

108 **Characterization of *Acinetobacter baumannii*-specific phages.** A group of nine *A. baumannii*  
109 strains, from different sites of infection and exhibiting different antimicrobial resistance profiles were selected  
110 for this study (31-35) (Fig. 1A). We used the Phage-on-Tap protocol (36) to isolate and purify phages into high-  
111 titer preparations targeting the nine strains. Eight bacteriophages were isolated and used to establish an *A.*  
112 *baumannii*-specific phage library. We tested the activity of the phages against all *A. baumannii* strains to  
113 determine the host infectivity range (Fig. 1A). The phage with the broadest host range, øCO01, was capable of  
114 productive infection in 4/10 strains, while phages øFG01, øCO02, øCO03 and øLK01 were highly specific and  
115 capable of productive infection in only their host of isolation.

116 Phages øFG02 and øCO01 were chosen for further characterization based upon their contrasting host  
117 ranges, high titers achievable during experimental amplification, and large phylogenetic distance between their  
118 hosts of isolation (AB900 and the carbapenem-resistant isolate A9844, respectively). Plaque morphology of  
119 both phages presented a distinctive hazy halo surrounding a zone of clear lysis (Fig. 1B). Microscopic  
120 examination of the phages revealed virion lengths of ~250 nm for øFG02 and ~200 nm for øCO01, with  
121 icosahedral capsids and sheathed contractile tails, consistent with the *Myoviridae* family of bacteriophages (Fig.  
122 1C). The one-step killing curve of øFG02 demonstrated a latency period of approximately 40 min, with a burst  
123 size of 15 plaque-forming units (PFU) per infection (Fig. 1D). For øCO01, the latency was ~41 min but the burst  
124 size was doubled, at 30 PFU/infection (Fig. 1E).

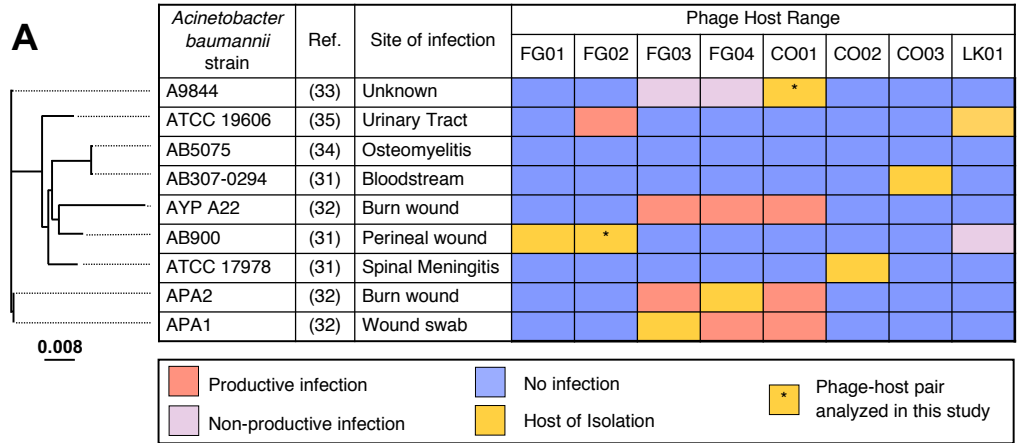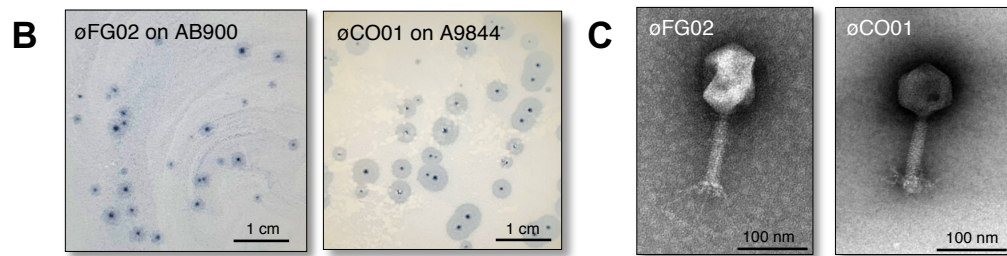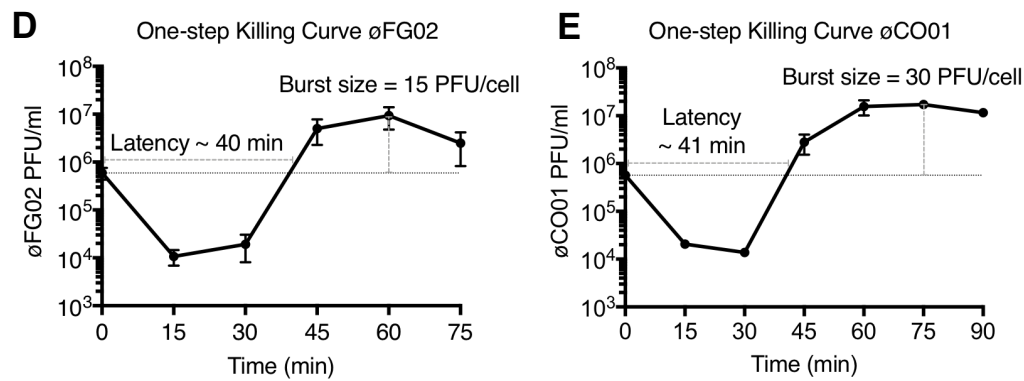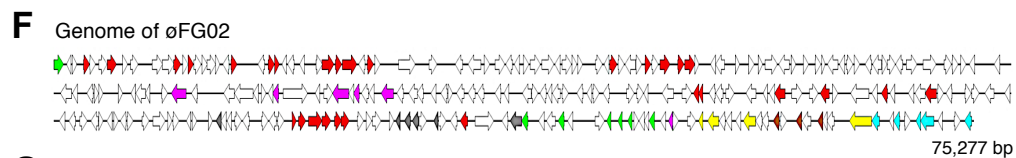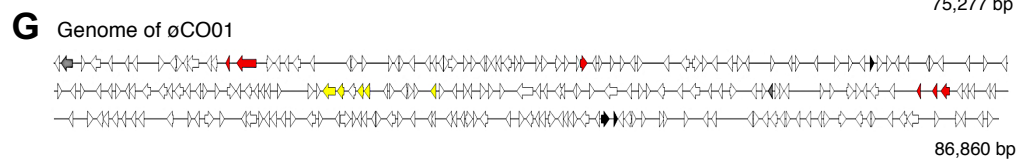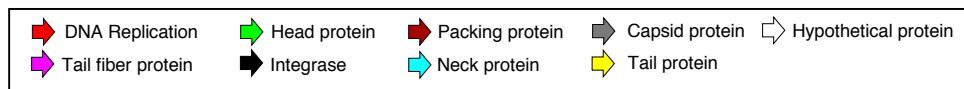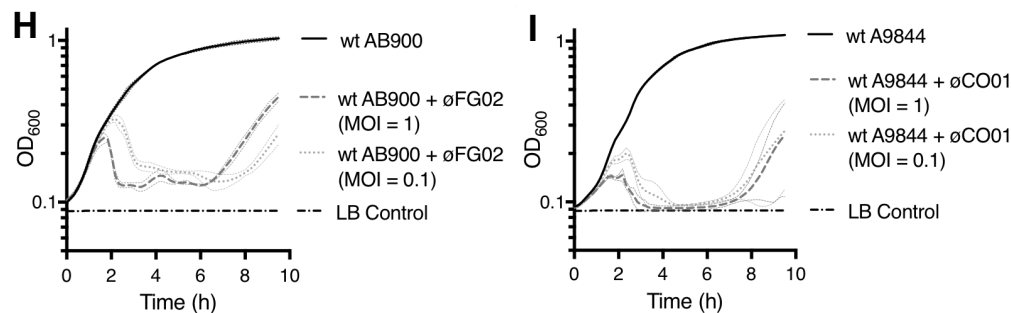

126 **Figure 1.** Characterization of *Acinetobacter baumannii*-specific phages. A: Host range of the eight *A. baumannii*-specific  
127 phages isolated in this study. Bacterial strains are ordered by the core-genome alignment phylogenetic tree on the left.  
128 Productive infection is defined as lysis on a spot assay and production of plaques on a soft agar overlay, whereas non-  
129 productive infection is defined as lysis on a spot assay with no plaques on a soft overlay agar. B: Plaque morphology of  
130 phage  $\phi$ FG02 on host AB900 and  $\phi$ CO01 on host A9844, showing the central clearings or lysis zones surrounded by hazy  
131 halos. C: Phage morphology as seen by transmission electron microscopy,  $\phi$ FG02 and  $\phi$ CO01 have icosahedral capsids  
132 and contractile sheathed tails, characteristic of the *Myoviridae* family. D and E: One-step killing curves of phages  $\phi$ FG02  
133 and  $\phi$ CO01 on their hosts of isolation. Latency time was measured from the beginning of the experiment to when the curve  
134 at exponential growth reached the initial phage inoculum, whereas burst size was calculated by dividing the maximum free  
135 phage count after bacterial burst by the initial phage titer in the experiment. Error bars represent standard error of the mean  
136 (SEM) (n = 3). F and G: Genome assemblies of phages  $\phi$ FG02 and  $\phi$ CO01 show structural and replication genes for both.  
137 The genome of  $\phi$ CO01 shows the presence of three predicted integrases. H and I: Growth curves of *A. baumannii* strains  
138 AB900 and A9844 with and without phages. Phages were applied at two different multiplicities of infection (1 and 0.1). Lytic  
139 activity of phages is shown by the drop in optical density shortly after initiation of the bacterial exponential growth phase;  
140 and emergence of phage resistance is shown after 6 h of incubation. Each curve's top and bottom dotted lines show the  
141 standard deviation (SD) (n = 3).

142  
143 Genome sequencing of  $\phi$ FG02 generated a single contig of 75,277 bp (44.4% G+C), which best  
144 matched with *Cronobacter* phage vB\_CsaM\_leN (90% coverage, 91.62% identity, GenBank accession number  
145 KX431560.1). RAST annotation predicted 255 protein-coding regions, and the VIBRANT (37) analysis—which  
146 uses multiple databases to annotate, determine the completeness and characterize virome function—revealed  
147 that  $\phi$ FG02's genome possessed a lytic nature, and predicted several phage structural and replication genes  
148 (Fig. 1F). For phage  $\phi$ CO01, we identified a contig of 86,860 bp (37.5% G+C) with a best match against  
149 *Acinetobacter* phage Ab105-3phi (54% coverage and > 89% identity, GenBank accession number KT588073.1).  
150 However, the contig also had high similarity (> 99% coverage and > 80% identity) with several *A. baumannii*  
151 genomes from the NCBI database and the VIBRANT analysis was negative for a lytic feature. Annotation of the  
152 contig revealed integrase genes along with phage structural genes (Fig. 1G). Based on this finding, we  
153 attempted to experimentally produce A9844 lysogens containing  $\phi$ CO01 via coinubation. We performed the  
154 experiment with two different concentrations of  $\phi$ CO01, and screened 18 colonies from each, without success  
155 (Fig. S1). This suggests that despite the presence of a predicted integrase in the genome of  $\phi$ CO01, it is  
156 incapable of lysogenizing its host of isolation, at least under regular *in vitro* conditions.

157 To further demonstrate the lytic activity of the phages, we coinubated them with their bacterial hosts  
158 at two different multiplicities of infection (MOI), 1 and 0.1. The growth curves (Fig. 1H and 1I) show phage lytic  
159 activity beginning during the bacterial exponential growth phase, with the bactericidal effect occurring earlier at  
160 a higher MOI. Both phages inhibited bacterial growth for just over 6 h and shortly thereafter, regardless of the  
161 phage MOI used, the strains developed phage-resistance and resumed growth *in vitro*.

162 **Isolation of phage-resistant *A. baumannii* mutants.** Bacteria are known to quickly develop phage-  
163 resistance when subjected to the selective pressure of lytic phages *in vitro*. We coinubated strains AB900 and  
164 A9844 in a semi-solid culture with phages  $\phi$ FG02 and  $\phi$ CO01, respectively. Colonies that were able to grow in  
165 the center of lysis zones (Fig. S2) subsequently underwent two single-colony isolation steps. Next, we  
166 performed inverted spotting assays (Fig. 2A and 2B) and growth curves (Fig. 2C and 2D) to confirm the phage-  
167 resistant phenotype of the selected colonies. From these assays, we picked a single mutant of strain AB900  
168 that was resistant (R) to phage  $\phi$ FG02 ( $\phi$ FG02-R AB900) and a single mutant of strain A9844 that was resistant  
169 (R) to phage  $\phi$ CO01 ( $\phi$ CO01-R A9844). *In vitro*, phage-resistant mutants did not revert to the wild type

170 phenotype despite  $\geq 10$  growth cycles (defined as the subculture on a liquid or solid medium without the  
 171 presence of phage). Growth curves showed a 3% increase in area under the curve (AUC) for  $\phi$ FG02-R AB900  
 172 and a 9% decrease for  $\phi$ CO01-R A9844 when compared to their wild type counterparts (Fig. S3).  
 173

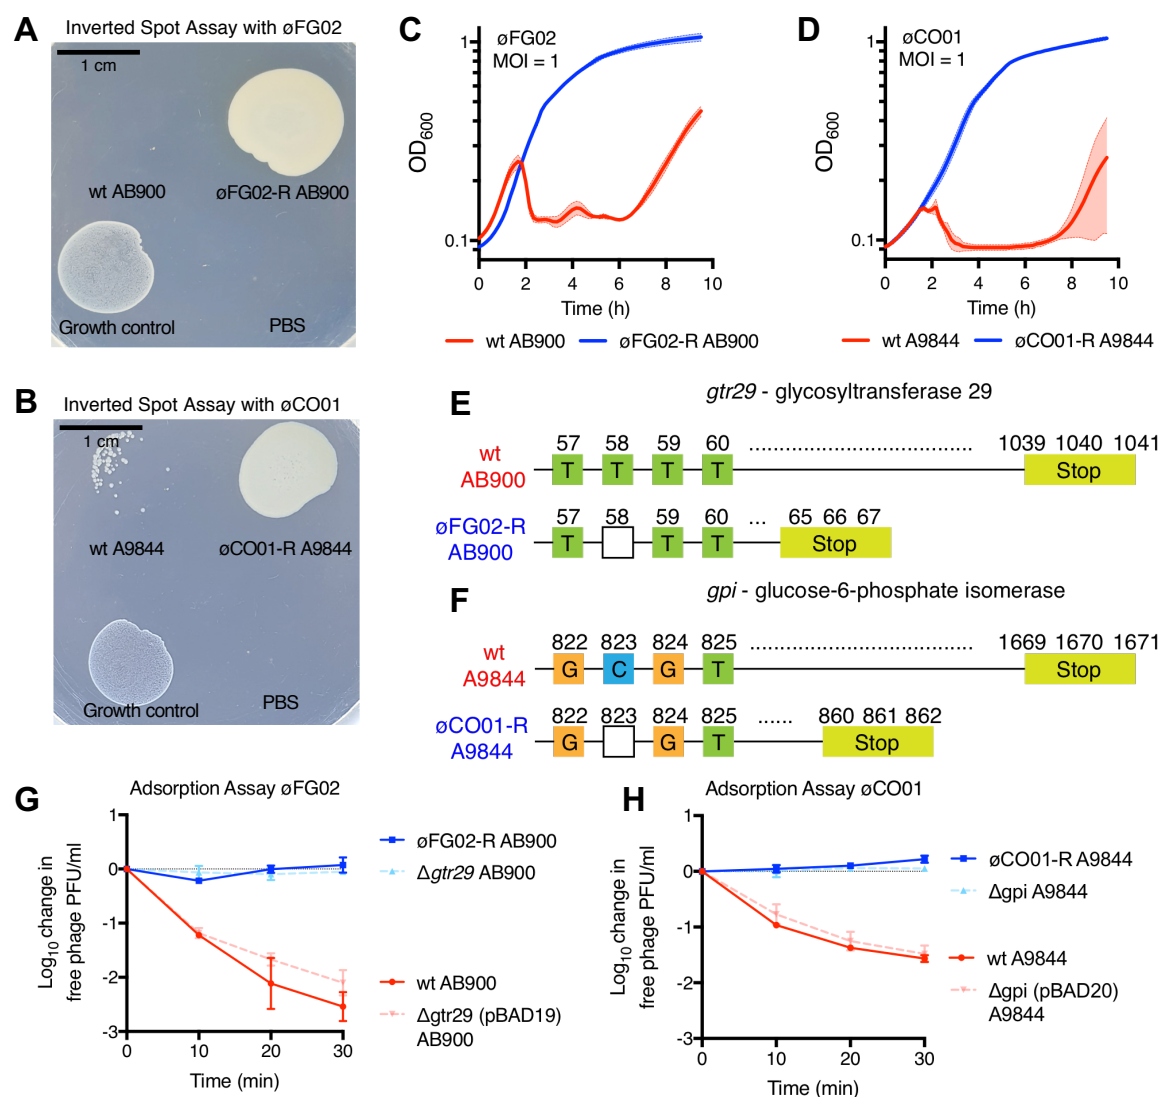

174  
 175  
 176 **Figure 2.** A. *baumannii* phage-resistant mutant strains, phage receptors and mechanism of phage resistance. A and B:  
 177 Inverted spot plate assay containing  $10^8$  PFU of phages  $\phi$ FG02 or  $\phi$ CO01. Lack of confluent growth of AB900 and A9844,  
 178 and confluent growth of  $\phi$ FG02-R AB900 and  $\phi$ CO01-R A9844 suggest phage-resistant phenotype. PBS used as a negative  
 179 control, and *Enterococcus faecium* as a bacterial growth control. C and D: Growth curves in the presence of phages at an  
 180 MOI of 1. Wild type strains AB900 and A9844 (in red) were affected by phage activity, whereas phage resistant mutants  
 181  $\phi$ FG02-R AB900 and  $\phi$ CO01-R A9844 (in blue) grew unaffected. Shaded zones represent SD (n = 3). E and F: Mutations  
 182 identified in  $\phi$ FG02-R AB900 and  $\phi$ CO01-R A9844 associated with the phage-resistant phenotype. For both strains, the  
 183 affected genes are in the K locus, and the single-nucleotide deletions led to premature truncation of the proteins. G and H:  
 184 Phage adsorption assay,  $\log_{10}$  reduction in free phage titers over a 30 min interval after mixing phages and hosts. Each  
 185 phage was mixed with either wild type, phage-resistant, knockout mutant, or plasmid-complemented hosts. Phages adsorb  
 186 to phage-sensitive strains (wild type and plasmid-complemented, shades of red) leading to a decrease in free phage titer,  
 187 whereas phages do not adsorb to phage-resistant strains (phage-resistant, knockout mutant, shades of blue). Error bars  
 188 represent SEM (n = 3).  
 189

190 **Identification of phage receptors and phage-resistance mechanisms in *A. baumannii*.** With the  
191 purpose of identifying the number, type, and loci of the mutations granting phage-resistance to our *A. baumannii*  
192 strains, we extracted genomic DNA from the wild type strains AB900, A9844 and their phage-resistant  
193 counterparts  $\emptyset$ FG02-R AB900 and  $\emptyset$ CO01-R A9844. Illumina® HiSeq 150 bp paired-end reads were used for  
194 a pairwise comparison of the bacterial genomes. In each phage-resistant strain, a single nucleotide deletion in  
195 a gene within the K locus was found (Fig. 2E and 2F). Genes in the K locus of *A. baumannii* regulate the  
196 production, modification and export of capsular polysaccharides (38). For  $\emptyset$ FG02-R AB900, the affected gene  
197 was *gtr29*, which codes for a glycosyltransferase and in  $\emptyset$ CO01-R A9844 it was *gpi*, which codes for the enzyme  
198 glucose-6-phosphate isomerase. In both cases, the identified deletions caused codon frameshifts resulting in  
199 the premature truncation of the proteins, at amino acid 21 out of 346, and 286 out of 556 for the  
200 glycosyltransferase and glucose-6-phosphate isomerase, respectively (Fig. 2E and 2F).

201 To demonstrate that the identified mutations were responsible for the phage-resistant phenotypes, we  
202 disrupted genes *gtr29* and *gpi* in AB900 and A9844, respectively, using a kanamycin-resistance cassette. Next,  
203 we used the newly-obtained strains  $\Delta$ *gtr29* AB900 and  $\Delta$ *gpi* A9844 in an efficiency of plating (EOP) assay and  
204 confirmed they were completely resistant to phages  $\emptyset$ FG02 and  $\emptyset$ CO01, respectively (EOP = 0%).  
205 Complementation analysis showed restoration of phage susceptibility (EOP = 100%), thus confirming the  
206 involvement of genes *gtr29* and *gpi* in phage infectivity.

207 Both *gtr29* and *gpi* are in the K locus and thus predicted to function in biosynthesis of capsular  
208 polysaccharides. We hypothesized that phages  $\emptyset$ FG02 and  $\emptyset$ CO01 used capsular polysaccharides as their  
209 receptors, and that the loss or modification of such receptors led to lack of phage adsorption and subsequent  
210 phage-resistance in *A. baumannii*. To test the hypothesis, we performed an adsorption assay using each phage  
211 and their respective strain set (wild type, phage-resistant isolate, knockout mutant and plasmid-complemented  
212 mutant) (Fig. 2G and 2H). Within 30 min, more than 99% and 97% of  $\emptyset$ FG02 and  $\emptyset$ CO01 particles had adsorbed  
213 to their respective wild type hosts. In contrast, the titers of free phage particles did not decrease when the  
214 phages were mixed with either the phage-resistant or knockout mutants, demonstrating the inability of phages  
215 to adsorb to these bacterial cells. As expected, phage adsorption was reinstated in the plasmid-complemented  
216 strains expressing *gtr29* and *gpi*. The adsorption assay supported our hypothesis that capsular polysaccharides  
217 are the phage receptor for  $\emptyset$ FG02 and  $\emptyset$ CO01 and that phage-resistance arose through alteration or loss of  
218 these receptors leading to inhibition of phage adsorption.

219 ***A. baumannii* phage-resistant strains exhibit phenotypic trade-offs.** As a next step, we sought to  
220 investigate if our phage-resistant *A. baumannii* strains would exhibit detrimental phenotypic trade-offs  
221 associated with their acquired mechanism of phage-resistance. We began tackling this question by assessing  
222 the production of capsular polysaccharides in the phage-resistant strains.

223 First, we used Maneval's staining technique to visually evaluate capsule production (Fig. 3A). Capsules  
224 were observed as unstained halos surrounding each bacterial cell (stained in pink), and the thickness of such  
225 halos is a proxy of capsule production. Wild type strains AB900 and A9844 were uniformly capsulated, whereas  
226 most of the cells of  $\emptyset$ FG02-R AB900 and  $\emptyset$ CO01-R A9844 appeared to lack capsules. Single cell imaging using  
227 scanning electron microscopy (SEM) (~100 cells per strain observed, consistent phenotypes throughout the  
228 observations), suggested that the surface of wild type A9844 possessed a complex polysaccharide capsule,  
229 including many pilus-shaped protrusions. In contrast, the appearance of the phage-resistant surface suggested  
230 loss of capsule. Less obvious differences were noted between AB900 and  $\emptyset$ FG02-R AB900 (Fig. 3B and S4).  
231 For a quantitative assessment of the phenotype, we assayed the production of surface polysaccharides using

232 the colorimetric sulfuric acid and phenol assay (39) (Fig. 3C). Using this technique, we observed 2.2-fold and  
 233 3-fold decrease in polysaccharide production in  $\emptyset$ FG02-R AB900 and  $\emptyset$ CO01-R A9844, respectively, compared  
 234 to their wild type strains ( $n = 3$ ;  $79 \pm 1.7 \mu\text{g/ml}$  vs.  $35.6 \pm 8.8 \mu\text{g/ml}$  [mean  $\pm$  SD]; unpaired t test;  $p = 0.001$ ; two-  
 235 tailed; for AB900 vs.  $\emptyset$ FG02-R AB900) ( $n = 3$ ;  $179.9 \pm 15.6 \mu\text{g/ml}$  vs.  $58.1 \pm 5.6 \mu\text{g/ml}$ ; unpaired t test;  $p =$   
 236  $0.0002$ ; two-tailed; for A9844 vs.  $\emptyset$ CO01-R A9844). In accordance, colonies of strains AB900 and A9844  
 237 exhibited a mucoid phenotype—viscous and sticky colonies—characteristic of capsule production, which was  
 238 lost in colonies of  $\emptyset$ CO01-R A9844 but not in  $\emptyset$ FG02-R AB900. Taken together, our findings indicate a major  
 239 defect in the overall production of capsule polysaccharides in the phage-resistant mutant strains, with these  
 240 results being consistently more pronounced in  $\emptyset$ CO01-R A9844.

241 Capsular polysaccharides aid in the attachment of bacterial cells to biotic and abiotic surfaces, which is  
 242 the first step in the formation of biofilms (16), one of the hallmarks of *A. baumannii* clinical infections. Having  
 243 observed a significant decrease in capsule production in the phage-resistant mutants, we tested if these mutants  
 244 had impaired biofilm production. We compared the ability of the strains to form biofilms on a polystyrene surface  
 245 at 48 h (Fig. 3D). As expected, the phage-resistant strains  $\emptyset$ FG02-R AB900 and  $\emptyset$ CO01-R A9844 had a 2.1-  
 246 fold and 3.6-fold reduction, respectively, in biofilm production when compared to their wild type counterparts  
 247 (Fig. 3E) ( $n = 3$ ; optical density of biofilm  $1 \pm 0.1$  vs.  $0.5 \pm 0.1$  [mean  $\pm$  SD]; unpaired t test;  $p = 0.0038$ , two-  
 248 tailed; for AB900 vs.  $\emptyset$ FG02-R AB900) ( $n = 3$ ;  $1.3 \pm 0.2$  vs.  $0.4 \pm 0.03$ ; unpaired t test;  $p = 0.001$ , two-tailed; for  
 249 A9844 vs.  $\emptyset$ CO01-R A9844). Thus, the acquisition of phage-resistance in our *A. baumannii* strains resulted in  
 250 the phenotypic trade-offs of impaired capsule production and biofilm formation.

251

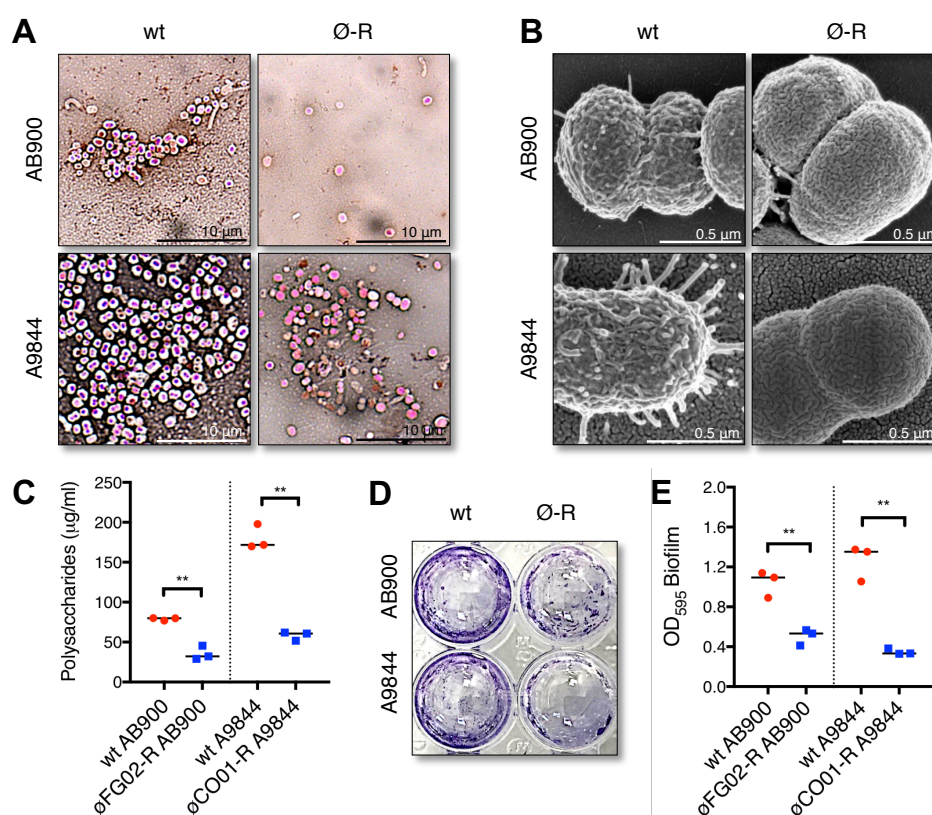

252  
 253 **Figure 3.** Phenotypic trade-offs of phage-resistance in *A. baumannii*. A: Microscopic inspection of capsule thickness in  
 254 slides stained using the Maneval's technique. B: Cell surface appearance as observed via scanning electron microscopy,  
 255 representative images from  $\sim 100$  observations (additional images in Fig. S4). C: Production of capsule polysaccharides



256 measured by absorbance of a colorimetric phenol-sulfuric acid reaction and extrapolated to a standard curve (Fig. S5). D  
257 and E: Biofilm production on a polystyrene surface at 48 h, measured by absorbance of crystal-violet stained and ethanol-  
258 solubilized biofilm. For the scatterplots in panels C and E, wild type strains represented in red and phage-resistant mutants  
259 in blue, bars represent medians (n = 3), each point represents the average from three technical replicates, unpaired t test \*\*  
260 = p < 0.005, two-tailed.

261

262 **Phage-resistant *A. baumannii* strains are more susceptible to antimicrobial agents.** Capsules and  
263 biofilms are major virulence determinants in *A. baumannii*. Part of their importance in bacterial pathogenesis  
264 relies on enabling *A. baumannii* to evade components of the host's immune response and to resist the effect of  
265 several antibiotics. Following the observed trade-offs of our *A. baumannii* phage-resistant mutants, we  
266 hypothesized the mutants would have become vulnerable to the action of various antimicrobial agents.

267 The complement system consists of a cascade of serum proteins capable of eliminating pathogens by  
268 attacking their membrane, and enhancing the activity of antibodies and phagocytes. We established a serum  
269 killing assay to determine the susceptibility of *A. baumannii* to the action of the human complement system (Fig.  
270 4A). Over a period of 180 min, wild type strains AB900 and A9844 withstood the effect of, and even grew in,  
271 human serum. Conversely, the phage-resistant mutants  $\emptyset$ FG02-R AB900 and  $\emptyset$ CO01-R A9844 were reduced  
272 below the level of detection in the serum even at the first timepoint of 45 min, representing a >4-log decrease.  
273 The results shown in the experiment can be safely attributed to the action of the complement system, as the  
274 antimicrobial effect was lost if heat-inactivated serum was instead used (data not shown).

275 As our mutants demonstrated heightened sensitivity to complement, we next sought to determine  
276 whether their susceptibility to seven clinically relevant antibiotics was also impacted. We used the microbroth  
277 dilution method and the CLSI guidelines for clinical interpretation (Fig. 4B, raw data in Table S1). Although  
278 AB900 is not an MDR strain, it is resistant to ceftazidime, a third-generation cephalosporin. The phage-resistant  
279 mutant strain  $\emptyset$ FG02-R AB900 presented a 16x decrease in the minimum inhibitory concentration (MIC) of  
280 ceftazidime, becoming sensitive to it, as well as 2x decrease in the MIC of fellow beta-lactams ampicillin +  
281 sulbactam and imipenem, and the fluoroquinolone ciprofloxacin. In contrast, A9844 is an MDR, carbapenem-  
282 resistant isolate, considered by the CDC as a priority pathogen. We observed that  $\emptyset$ CO01-R A9844 presented  
283 a 2x reduction in the MIC of minocycline and ampicillin + sulbactam. The latter resulted in a change of the  
284 clinical interpretation of the MIC, making A9844 sensitive to ampicillin + sulbactam. However,  $\emptyset$ CO01-R A9844  
285 also exhibited a 2x increase in the MIC for the aminoglycoside amikacin, but without a change in the clinical  
286 interpretation. The findings show instances of antibiotic resensitization occurring as a trade-off of phage-  
287 resistance in *A. baumannii*.

288 Finally, we tested another antimicrobial strategy, our *A. baumannii*-specific phage library, against  
289 strains  $\emptyset$ FG02-R AB900 and  $\emptyset$ CO01-R A9844 for extended phage-host range (Fig. 4C). We observed that,  
290 upon acquiring resistance to phage  $\emptyset$ FG02, strain  $\emptyset$ FG02-R AB900 became sensitive to phage  $\emptyset$ LK01, which  
291 was previously only capable of non-productive infection in wild type AB900. Furthermore, strain  $\emptyset$ CO01-R  
292 A9844 became vulnerable to the lytic action of three new phages,  $\emptyset$ FG01,  $\emptyset$ FG02 and  $\emptyset$ LK01. In summary,  
293 acquisition of phage-resistance was accompanied by resensitization to at least three different types of  
294 antimicrobial agents. This discovery is relevant, as all of the agents can play a role in the clinical setting during  
295 the treatment of *A. baumannii* infections.

296

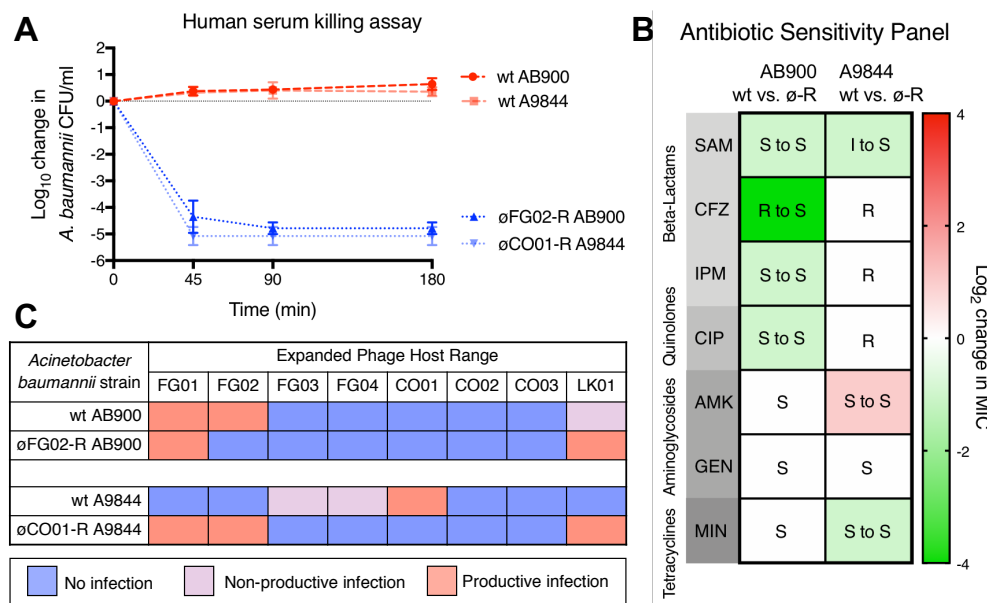

297  
 298 **Figure 4.** Increased sensitivity of phage-resistant *A. baumannii* to antimicrobial agents. A: Human serum killing assay.  
 299 Freshly-thawed human serum was inoculated with  $10^5$  CFU/ml of *A. baumannii*, and the change in bacterial load was  
 300 measured at regular intervals. Wild type strains (shades of red) grew in serum whereas phage-resistant strains (shades of  
 301 blue) were rapidly killed; error bars represent SEM ( $n = 3$ ). B: Antibiotic sensitivity pattern. The minimum inhibitory  
 302 concentrations (MICs) of 7 antibiotics, from 4 pharmacological groups were measured using the microbroth dilution method.  
 303 The median ( $n = 3$ ) of the  $\log_2$  change in MIC between the wild type and phage-resistant strains is color coded, with shades  
 304 of green showing a reduction in MIC in phage-resistant mutants, shades of red showing an increase in MIC, and white  
 305 showing no change for each specific antibiotic. Inside each cell, the clinical interpretation of the MIC is shown (S = Sensitive,  
 306 I = Intermediate, R = Resistant). Raw data values are available in Table S1. SAM: ampicillin + sulbactam, CFZ: ceftazidime,  
 307 IPM: imipenem, CIP: ciprofloxacin, AMK: amikacin, GEN: gentamicin, MIN: minocycline. C: Expanded phage host range  
 308 map of the *A. baumannii*-specific phage library against øFG02-R AB900 and øCO01-R A9844 reveals sensitization to  
 309 additional phages.

310  
 311 **Phage-resistant *A. baumannii* strains show decreased fitness *in vivo*.** The trade-offs of impaired  
 312 capsule production and resensitization to antimicrobials could affect *A. baumannii*'s ability to invade and survive  
 313 in mammalian hosts (40, 41). We therefore sought to observe the *in vivo* fitness of our phage-resistant mutants.  
 314 To achieve this, we established a murine model of septicemia via intraperitoneal injection of  $10^6$  CFU with 6%  
 315 porcine stomach mucin. Groups of 6-to-10 weeks old, female, BALB/c mice ( $n = 4$ ) were infected with either  
 316 AB900, A9844, or their phage-resistant counterparts. After 8 h, the levels of bacterial colonization were  
 317 assessed for the blood, liver, kidney and spleen. In both strain pairs, we observed a 2-log reduction of bacterial  
 318 load in solid organs and a >3-log reduction in blood for phage-resistant mutants, when compared to wild type  
 319 strains (Fig. 5A and 5B) ( $n = 4$ ; Mann-Whitney test,  $p = 0.0286$  for all comparisons except kidney in A9844 [ $p =$   
 320  $0.0571$ ], two-tailed). Interestingly, after their passage through the animal hosts, øCO01-R A9844 bacteria did  
 321 not revert to the wild type form, but in 2 out of the 4 mice infected with øFG02-R AB900 there was evidence of  
 322 reversion to wild type AB900. This reversion was only seen in bacteria retrieved from solid organs and not blood  
 323 and, in one of the animal hosts, it was heterogeneous, meaning that populations of both wild type-reverted and  
 324 phage-resistant mutants were retrieved. These observations supported the hypothesis that phage-resistant *A.*  
 325 *baumannii* suffers a fitness cost *in vivo*.

326

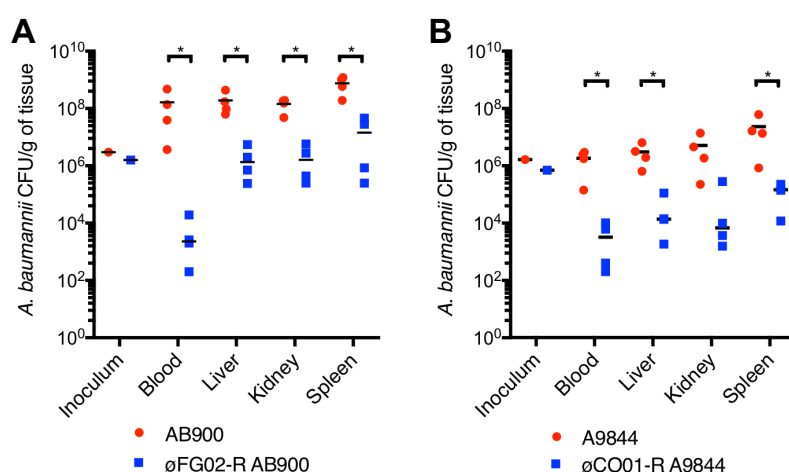

327

328

329 **Figure 5.** *In vivo* fitness is reduced in phage-resistant *A. baumannii*. 4 groups of 4 female, 6-to-10 weeks old, BALB/c mice  
330 were subjected to intraperitoneal (IP) injection of  $10^6$  colony forming units of either AB900, A9844, øFG02-R AB900 or  
331 øCO01-R A9844. At the humane endpoint of 8 h, blood, liver, kidney and spleen were collected for bacterial quantification.

332 A and B: Bacterial burdens at 8 h post infection, normalized by tissue weight. Wild type strains in red, phage-resistant strains

333 in blue. Each data point represents an animal, with black bars representing the median values, Mann-Whitney test \* =  $p <$

334 0.05, two-tailed.

335

336

337

338

339

340

341

342

343

344

345

346

347

348

349

350

351

352

353

354

355

356

357

358

## Discussion

Antibiotic-resistant *A. baumannii* was recently deemed the top priority pathogen requiring new therapeutic strategies (4), and it certainly is one of the most threatening pathogens encountered in clinical practice (8). In this study, we isolated novel phages against a phylogenetically diverse panel of *A. baumannii* strains and provided a detailed characterization of two of them: øFG02 and øCO01. Despite the strong lytic activity of these phages, we observed the rapid emergence of phage-resistant mutants *in vitro*. Phage-resistance is often seen as a prominent road-block for efficacious phage therapy, with up to 80% of preclinical and clinical phage therapy trials reporting emergence of phage-resistant mutants (42). Detailed characterization of phage biology and identification of host receptors enabled us to identify the mechanism of phage-resistance in this pathogen. Phage-resistant strains harbored loss-of-function mutations in genes of the K locus, which are responsible for the biosynthesis of capsular polysaccharides. Using genetic engineering, we confirmed that disruption of glycosyltransferase 29 and glucose-6-phosphate isomerase led to phage-resistance in *A. baumannii* strains AB900 and A9844, respectively. Furthermore, an adsorption assay supported our hypothesis that phage-resistance emerged through disruption the phage receptors resulting in lack of phage adsorption. We also determined that capsule loss in phage-resistant *A. baumannii* is associated with a reduction in biofilm formation, resensitization to antimicrobial agents including antibiotics, human complement, and additional phages, and a reduction in fitness in a murine model of bacteremia. These results demonstrate that the capsular polysaccharides of *A. baumannii* are the receptors for phages øFG02 and øCO01. To the best of our knowledge, this is the first confirmation of a phage receptor in this key MDR superbug. These findings provide a step towards the exploitation of the fitness trade-offs of phage-resistance and improvement in the clinical translation of phage therapy.

The therapeutic use of lysogenic phages is subject to ongoing debate. Their use is normally inadvisable due to risks such as lysogenic conversion of the host, or reduced clinical effect (17). However, in the absence of lytic phages against a particular pathogen, or in emergency cases, their use might be justified (17). The

359 genomic analysis of one of our phages, øCO01, revealed three putative integrase genes and significant  
360 sequence homology with *A. baumannii* genomes, suggesting a possible lysogenic nature. Although we cannot  
361 conclusively rule out the possibility of temperate behavior in øCO01, the phage displayed strong lytic activity in  
362 phenotypic assays (Figs. 1B, 1E and 1I), and was not able to lysogenize its host of isolation, A9844, *in vitro*  
363 (Fig. S1). Notably, the sequence analysis of øCO01 revealed a best match to *Acinetobacter* phage Ab105-3phi  
364 with a modest 54% coverage and >89% identity, so further investigation of gene function in øCO01 is warranted.  
365 It is possible that øCO01 emerged through recombination between a lytic and a lysogenic phage, and while it  
366 contains putative integrases, it behaves as a lytic phage on host A9844 under *in vitro* conditions. We suggest  
367 that experimental validation of a phage's capacity to lysogenize a host, rather than simply the presence of a  
368 putative integrase gene, may be a more appropriate determinant for the selection of phages for therapeutic use.

369 Bacterial capsules have been demonstrated to be key virulence factors (11, 16). In *A. baumannii*,  
370 capsule biosynthesis is a complex and well-regulated process that involves up to 10 different groups of proteins  
371 (16, 38). The capsule is comprised of tightly packed repeating subunits (K units) that consist of 4 to 6 sugars,  
372 with a large diversity of K unit structures identified to date (16, 23). From our phage-resistant *A. baumannii*  
373 isolates, we identified mutations in two enzymes that are required for the early stages of K unit production.  
374 Specifically, the enzyme glucose-6-phosphate isomerase catalyzes the conversion of glucose-6-phosphate to  
375 fructose-6-phosphate, forming one of the many simple sugars that can constitute part of a K unit, while the  
376 glycosyltransferase is required to assemble specific sugars into the growing chain of the K unit. The biochemical  
377 structures of the K units of the capsules of AB900 and A9844 have been previously described (23, 43, 44).  
378 However, the exact effects that our mutations had on these structures were not elucidated here and were  
379 outside the scope of this study. As a result, we were only able to conclude that phages øFG02 and øCO01 use  
380 the capsule polysaccharides of *A. baumannii* as receptors, a phenomenon previously described for phages  
381 targeting the pathogens *Campylobacter jejuni* (45), *Salmonella enterica* (46) and *Klebsiella pneumoniae* (47),  
382 with the specific K unit polysaccharide structure remaining to be identified.

383 The most clinically important trade-off of phage-resistance observed in our *A. baumannii* strains was  
384 perhaps the resensitization to three types of antimicrobial agents. Antibiotic resensitization could be broadly  
385 explained through loss of capsule, theoretically making it easier for the drugs to access their target site.  
386 However, the fact that resensitization primarily occurred towards beta-lactams—which act via disruption of the  
387 cell wall—suggests a more specific mechanism. It has been described, for example, that inactivating mutations  
388 in genes encoding the Wzc or Wza components of the capsule secretion system in *A. baumannii* also lead to  
389 increased susceptibility to beta-lactams (11). It is possible that capsule-deficient bacterial cells have a lower  
390 tolerance threshold to further disruptions in components of the cell envelope. Further research is needed to  
391 determine if antibiotic protection provided by *A. baumannii* capsules is strain specific, capsule-type specific, or  
392 universal (16). It is also worth noting that despite the microbroth dilution method being the gold standard for  
393 antibiotic sensitivity testing (48), we cannot rule out the influence of test variability in our results, particularly in  
394 changes in MIC  $\leq 2x$  between wild type and phage-resistant mutants. Susceptibility to complement-mediated  
395 killing can also be explained by the loss of capsule, as the hydrophilicity and negative charge of capsule sugars  
396 would normally limit complement deposition on the bacterial surface (11). Finally, the alteration of the surface  
397 polysaccharides in the phage-resistant mutants could have unmasked or generated other receptors that were  
398 recognized by additional phages, explaining the observed changes in the phage host range, and allowing us to  
399 enhance and extend the use of phage therapy. Interestingly, both phages analyzed in this study presented  
400 plaque morphologies of lytic centers surrounded by hazy halos (Fig. 1B), which suggest the production of

401 depolymerases, enzymes capable of digesting capsular polysaccharides (49). Further research could pursue  
402 the purification and characterization of the biological activity of these enzymes, attempting to replicate the  
403 described effects of capsule loss in *A. baumannii*.

404 Despite being situated within the K locus in *A. baumannii*, the physiological role of glycosyltransferase  
405 29 and glucose-6-phosphate isomerase may go beyond capsule production. Genes from the K locus are also  
406 used during the biosynthesis of outer membrane lipooligosaccharides (16), and some of the proteins they  
407 encode have been described as “multitaskers” involved in bacterial virulence and metabolism (50). As such, it  
408 is possible that further effects of the disruption of *gtr29* and *gpi*, unrelated to capsule loss, could be identified in  
409 our phage-resistant mutants. Altered production of glycosyltransferases and glucose-6-phosphate isomerase  
410 has been previously shown to affect virulence and resistance to antimicrobials through different routes in a few  
411 pathogens. Boinett et al. (51) identified *gpi* and at least two glycosyltransferases as some of many upregulated  
412 genes in colistin-resistant strains of *A. baumannii*. Zhang et al. (52) demonstrated that isomerase-deficient  
413 mutants of the fungal pathogen *Cryptococcus neoformans* had reduced capsule biosynthesis, disruptions in  
414 their cell wall and plasma membrane and exhibited hypersensitivity to osmotic stress. Moreover, Tsuge et al.  
415 (53) noted a significant reduction in virulence upon inactivation of glucose-6-phosphate isomerase in the plant  
416 pathogen *Xanthomonas oryzae*, possibly due to impaired carbohydrate uptake. Investigating further trade-offs  
417 in our phage-resistant mutants could lead to the discovery of other clinically exploitable phenotypes.

418 Our results suggest that the capsule of *A. baumannii* acts as a phage receptor and tropism determinant.  
419 We worked with two *A. baumannii* phages isolated from phylogenetically distant strains, both of which induced  
420 loss-of-function mutations: although distinct, the affected genes were located within the same locus and are  
421 both involved in the production of capsular polysaccharides. This is further supported by recent studies  
422 documenting that phage tail fibers directly interact with *A. baumannii* capsular polysaccharides (54, 55) and a  
423 phage therapy case study treating a complicated MDR *A. baumannii* infection that reported capsule loss upon  
424 emergence of phage-resistance (22). However, it should be noted that all these studies have focused on a small  
425 number of phages and that other *A. baumannii* phage receptors are likely.

426 We attribute the emergence of phage-resistance to the loss of *A. baumannii*'s capsule, which  
427 subsequently results in clinically exploitable fitness trade-offs. However, our study has only characterized a  
428 single phage-resistant isolate, each, from AB900 and A9844, and there exists the potential for other  
429 independently evolved resistance mutations to emerge that lack these phenotypes. Thus, a key question is  
430 whether the evolution of phage-resistance in *A. baumannii* is repeatable and predictable. An analysis of the K  
431 loci in heterogeneous populations of phage-resistant mutants could demonstrate the diversity of mutations  
432 occurring therein or, conversely, point to other pathways of phage-resistance evolution not involving the K locus.  
433 Finally, an important follow-up experiment should aim to identify whether the mechanisms of phage-resistance  
434 acquisition reported here also occur *in vivo*.

435 We previously theorized an approach to phage therapy delivery based on the exploitation of phage-  
436 resistance (17). As demonstrated in this study, the emergence of phage-resistance in *A. baumannii* can be  
437 accompanied by exploitable trade-offs. But in order to consistently and reliably take advantage of them, we  
438 require a detailed characterization of the phages, their hosts, their receptors and their mechanisms of infection  
439 and resistance. Ideally, this approach to phage therapy would employ phages that exhibit strong antimicrobial  
440 effects, and force a predictable evolutionary response by the pathogen, through known mechanisms of phage-  
441 resistance, thereby allowing physicians to foresee their next therapeutic intervention and stay a step ahead of  
442 the pathogen (Fig. 6). In a previous clinical case of phage therapy use against MDR *A. baumannii* (22), where

443 the trade-offs of capsule loss and resensitization to an antibiotic were seen in phage-resistant mutants, these  
444 findings were not anticipated nor mechanistically explained, arguably limiting their efficient clinical exploitation.

445 The ultimate goal of our research is to enable the successful clinical translation of phage therapy against  
446 *A. baumannii* and other MDR pathogens. Importantly, the findings of our study highlight that phage therapy  
447 should not be proposed as a replacement for antibiotic therapy. In fact, we demonstrate that phages can be  
448 used not only for their lytic activity, but, when combined with *a posteriori* knowledge of receptors and emergence  
449 of phage-resistance, as a resensitization strategy empowering other antimicrobial agents. Improving the  
450 efficacy, and furthering the clinical impact of phage therapy, is an important step in the fight against the  
451 postantibiotic era.  
452

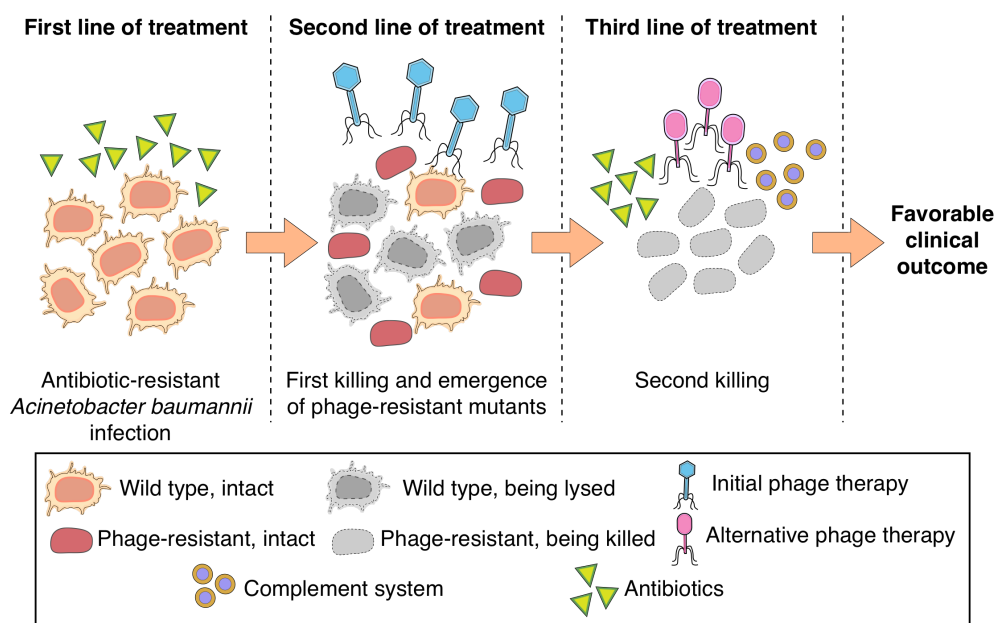

453  
454 **Figure 6.** An approach toward phage therapy utilizing lytic activity of phages, *a posteriori* knowledge of receptors, predictable  
455 emergence of phage-resistance and exploitation of fitness trade-offs. An MDR *A. baumannii* infection (capsulated red cells)  
456 will typically withstand antibiotic treatment (first line of treatment). We can pursue the use of phage therapy (second line of  
457 treatment), the lytic activity of the phages resulting in a first killing and the emergence of phage-resistant mutants  
458 (unencapsulated red cells). We can exploit the trade-offs of phage-resistance using a third line of treatment that can include  
459 re-potentiating antibiotics, alternative phages, and the immune system. This will result in a second killing leading to an  
460 improved clinical outcome.

461

## 462 **Materials and Methods**

463 **Bacterial strains, plasmids, and culture conditions.** A complete list of strains and plasmids used in  
464 this study can be found in Table S2. Bacteria were cultured using either lysogeny broth (LB) or Mueller Hinton  
465 broth (MHB) (Sigma-Aldrich, Australia), at 37 °C with aeration, supplemented with agar and/or 50 µg/ml of  
466 kanamycin sulfate, as required.

467 **Phage isolation, amplification and storage.** Phages were isolated from raw sewage samples  
468 obtained from several states in Australia (Queensland, New South Wales, and Victoria). Aliquots of sewage  
469 were combined with overnight cultures of up to three bacterial strains, and supplemented with 10x LB and 10  
470 mM CaCl<sub>2</sub> and MgSO<sub>4</sub>. Mixtures were incubated overnight and the resulting lysates were purified with the

471 previously described Phage-on-Tap protocol (36). The lysates were titrated in plaque forming units (PFU) per  
472 ml and stored at 4 °C.

473 **Determination of phage host range and efficiency of plating.** The lytic activity of each phage was  
474 screened against nine *A. baumannii* strains with the standard spot assay as previously described (56). For  
475 comparing the efficiency of phage infection between hosts, the efficiency of plating (EOP) assay was used.  
476 Overnight bacterial cultures were standardized to an optical density at 600 nm (OD<sub>600</sub>) of 0.3 using a  
477 spectrophotometer. This density was previously assessed to be roughly equivalent to 5x10<sup>7</sup> CFU/ml. Next, soft  
478 agar overlays were set up with known concentrations of phage lysate (10<sup>1</sup>-10<sup>3</sup> PFUs). After incubation, the  
479 plates were inspected for plaques and the average number of plaques was recorded and compared as a  
480 percentage of the plaques found in the original host of isolation.

481 **Transmission Electron Microscopy (TEM).** Further purification of the phage lysates, using the  
482 Vivaspin 6 centrifugal concentrator (MWCO 1,000,000 kDa) (Sartorius, Australia), was required for high-quality  
483 electron microscopy visualization. Then, 10 µl droplets of phage suspension were placed on copper TEM grids  
484 (200 mesh, SPI, USA) with carbon-coated ultrathin (invisible on the water surface) formvar film (57). They were  
485 left for 30 seconds and then dried using filter paper. A 10 µl droplet of uranyl acetate water solution (1% w/v)  
486 was then added to the grid surface and left for 20 seconds. The grid was dried with filter paper, and then  
487 examined under a TEM (JEM-1400 Plus; Jeol, Japan) at an accelerating voltage of 80 kV.

488 **One-step phage killing curves and adsorption assay.** Bacteria from overnight cultures and phages  
489 from pure lysates were mixed at a multiplicity of infection (MOI) of 0.01 (10<sup>6</sup> PFU/ml to 10<sup>8</sup> colony forming units  
490 [CFU]/ml) in LB. The suspensions were incubated at 37 °C with aeration. At each timepoint, samples of the  
491 suspensions were transferred into chloroform-saturated PBS, vortexed, and then centrifuged at 3,500x g for 3  
492 min. The supernatant was diluted in PBS and plated in duplicate for quantification of free phage particles.

493 **Extraction of phage DNA, minION sequencing and phage genome analysis.** A starting volume of  
494 1.8 ml of phage lysate with a concentration of > 10<sup>10</sup> PFU/ml was treated with DNase and RNase A. DNA was  
495 extracted using the phenol-chloroform method and purified with isopropanol and sodium acetate as described  
496 previously (58). The extracted DNA was dissolved in nuclease free water, then quantified and its purity assessed  
497 using a Nanodrop (NanoDrop Technologies, Wilmington, DE, USA), Qubit fluorometer (Life Technologies,  
498 Carlsbad, CA, USA), and 1% agarose gel electrophoresis. 1 µg of DNA was used for library preparation using  
499 the Ligation Sequencing Kit 1D (SQK-LSK109, Oxford Nanopore Technologies, ONT, Oxford UK) following the  
500 manufacturer's instructions. The sequencing libraries were multiplexed and loaded into the Flow Cell FLO-  
501 MIN106 Spot-ON of the MinION system using a Library Loading Bead Kit R9 according to the manufacturer's  
502 instructions. The raw reads were obtained using MinKNOW v1.7.14 in a 48 h-run experiment and base calling  
503 was performed using ONT default software. Deepbinner v0.2.0 (59) was used to demultiplex the raw reads.  
504 Reads smaller than 500 bp were removed using Trimmomatic v.0.39 (60) and the remainder assembled using  
505 Unicycler v0.4.3 (61). Genome annotation was performed by combining multiple tools: the RAST server (62),  
506 PHASTER (63) and VIBRANT (37).

507 **Lysogen isolation.** Based on a previously described protocol (64), a spot assay was established with  
508 the phage-host pair of interest. After 48 h of incubation, cloudy and confluent centers of bacterial growth within  
509 zones of lysis were identified. Bacterial growth from these zones was scraped off using a sterile loop and streak-  
510 plated. After overnight incubation, 36 colonies were tested for lysogeny using a patch test. For this test, single  
511 colonies were patch-plated onto two LB plates, the second one of which contained a soft agar lawn of the wild  
512 type host. After 48 h of incubation, the plates were examined looking for halos of lysis around the patches of

513 the second plate. All presumptive lysogens then underwent three rounds of single-colony purification before  
514 repeating a patch test. Finally, liquid cultures of the possible lysogens were pelleted, and the supernatants were  
515 filtered through a 0.2  $\mu\text{m}$  filter and tested for spontaneous phage release using spot assays.

516 **Bacterial kinetics.** Growth kinetics were determined using a 96 well plate format, measuring OD<sub>600</sub>  
517 every 10 min with a starting inoculum of 10<sup>6</sup> CFUs, unless otherwise specified, and phage PFUs at MOIs of  
518 either 0, 1 or 0.1. Where required, area under the curve (AUC) was calculated from a baseline of  $y = 0.1$  and  
519 the percent difference calculated (65).

520 **Isolation of phage-resistant *A. baumannii* mutants.** Following the same principle as the spot assay,  
521 25  $\mu\text{l}$  aliquots of pure lysate (concentration > 10<sup>8</sup> PFU/ml) were spotted onto bacterial lawns. After an overnight  
522 incubation, bacterial colonies growing in the middle of lysis zones were picked and streaked onto LB agar plates  
523 for two rounds of single-colony isolation. The phage-resistant phenotypes were confirmed using three methods:  
524 inverted spot plate assays (66), standard soft agar overlay assays, and *in vitro* growth curves. Phage-resistant  
525 mutant strains were tested bimonthly to ensure reversion to a phage-sensitive phenotype did not occur.

526 **Extraction of bacterial genomic DNA, sequencing, bacterial genome comparison and**  
527 **phylogenetic analysis.** The GenElute™ Bacterial Genomic DNA Kit protocol (Sigma-Aldrich, Australia) was  
528 used for DNA extraction. Bacterial genomic DNA was tested for purity as previously described for phage DNA  
529 and vacuum dried into a pellet for transport. Sequencing was performed using the Illumina® HiSeq 150 bp  
530 paired-end platform at the Genewiz® facilities (Suzhou, China).

531 The genomes of AB900, A9844 and their phage-resistant counterparts, were independently assembled  
532 from the paired-end 150 nt Illumina reads. Adapter sequences were clipped using Trimmomatic v0.39 (60) in  
533 palindrome mode, with quality filtering, quality trimming and length filtering (AVGQUAL:35  
534 SLIDINGWINDOW:5:28 MINLEN:80). Trimming outcomes were checked in trimviz  
535 ([github.com/MonashBioinformaticsPlatform/trimviz](https://github.com/MonashBioinformaticsPlatform/trimviz)). Reads were assembled using Spades v3.12.0 (67) with a  
536 coverage cutoff of 10 in 'careful' mode. To identify variants, the filtered sequencing data was mapped back onto  
537 the assemblies using BWA (68) as implemented in RNAsik v1.5.0 (69). Both phage-sensitive (S) and phage-  
538 resistant (R) sequencing data was mapped back onto each of the genome assemblies from S and R isolates,  
539 resulting in 4 alignment files per strain pair (S on S; S on R; R on S; and R on R). Pileup files were generated  
540 using samtools mpileup v1.8 and processed using Varscan2 v2.4.0 (70) in both "pileup2snp" and "pileup2indel"  
541 modes. Candidate variants (several thousand per alignment) were then filtered using a custom Python script  
542 for: 1) contig length > 500 nt; 2) contig coverage in the Spades assembly > 50; 3) realignment coverage > 30  
543 reads at the variant site; 4) if the variant is also detected in the self-alignment (S on S) its frequency (proportion  
544 of supporting reads vs total overlapping reads) must be at least 25% higher in the non-self-alignment (R on S).  
545 Surviving variants were few enough in number to be manually verified. R on S alignments around candidate  
546 variants were viewed in IGV v2.3.59 (71) together with the .gff3 annotation files generated by Prokka v.1.13.7  
547 (72) to check for coding-region disruptions, and compared to the self-alignment (S on S) to check for alignment  
548 artefacts. The reciprocal alignments (S on R, checking R on R for alignment artefacts) were also verified in the  
549 homologous region of the R assembly.

550 To infer overall sequence-based relationships between the strains in this study, the publicly available  
551 genome assemblies were downloaded (Table S3). For strain AYP A22, however, only raw sequencing data was  
552 available, so this was trimmed and assembled as above (Trimmomatic parameters were adjusted to  
553 AVGQUAL:28 SLIDINGWINDOW:5:23 MINLEN:40 without adapter-trimming). All assemblies were *de novo*  
554 annotated using Prokka and core-genome alignments of coding regions common to all the strains were created



555 using Roary v3.11.2 (73). Alignments were converted to PHYLIP format and fed into RAXML v8.2.12 (74) (with  
556 the GTRCAT substitution model). To illustrate the relationships between the strains documented in Figure 1,  
557 the data was visualized using the R package APE v5.3 (75).

558 **Gene knockout and complementation.** All PCR reactions mentioned in this section were performed  
559 using KAPA HiFi DNA Polymerase (Hot Start and Ready Mix formulation) (Roche, Switzerland). Genes of  
560 interest were disrupted using a variation of the methods described previously (76). Briefly, ~1000 bp upstream  
561 and downstream of the target genes were PCR-amplified from genomic DNA. The kanamycin resistance  
562 cassette was amplified from pKD4 (76), and three products combined by splice overlap PCR using primers  
563 specified in Table S4. The linear constructs were gel purified using a PCR cleanup kit (Sigma-Aldrich, Australia),  
564 confirmed by Sanger sequencing and concentrated to ~500 ng/μl.

565 *A. baumannii* cells were made electrocompetent as follows. Overnight cultures were diluted 1:20 and  
566 allowed to grow to an OD<sub>600</sub> of 0.7. A volume of 5 ml of culture per transformation was pelleted by centrifugation,  
567 the cells were washed 3 times in 10% (v/v) glycerol and finally resuspended in 10% glycerol. The cell suspension  
568 was mixed with recombinant DNA (~3 μg) and incubated at room temperature for 15 min. The mixture was  
569 transferred to a sterile 2 mm electroporation cuvette (Biorad, Australia) and immediately pulsed with a Bio-Rad  
570 Micropulser (EC3, 3.0 kV). Pre-warmed (37 °C) Super Optimal Broth (SOB) was immediately added and the  
571 cells were transferred to a new tube. The cells were recovered for 3 hours rotating at 37 °C. The recovered cells  
572 were pelleted, resuspended in SOB, and spread-plated onto LB agar with and without 50 μg/ml of kanamycin.  
573 Isolated colonies from the transformation were patch-plated on LB agar containing 50 μg/ml of kanamycin for  
574 two successive re-streaks to ensure kanamycin resistance. Colonies of the knockout mutants were PCR-  
575 amplified with the primers on Table S4, ran on a 0.7% agarose gel, and the bands were gel-purified and Sanger-  
576 sequenced in order to identify the successful disruption of genes of interest via the insertion of the kanamycin  
577 resistance cassette.

578 For complementing the genes of interest back into the knockout mutants, the genes were PCR-amplified  
579 using primers containing cut sites for the restriction enzymes *EcoRI* (forward) and *SalI* (reverse) (New England  
580 Biolabs, NEB, Australia) for *gtr29*, or *SalI* exclusively in the case of *gpi*. Next, two overnight double-digestions  
581 were set up at 37 °C for the plasmid pBAD18Kan-Ori (77) and the genes of interest using the restriction  
582 enzymes. The digested products were run on a 0.7% agarose gel, excised, purified and ligated for 2 h at room  
583 temperature using the Instant Sticky-end Ligase Master Mix (NEB, Australia) following the manufacturer's  
584 protocol. The ligated product was then chemically transformed into *Escherichia coli* DH5-α competent cells  
585 (NEB, Australia) following the company's protocol. The transformed colonies were patch-plated onto  
586 kanamycin-LB plates (50 μg/ml), and confirmed via Sanger sequencing. These confirmed colonies underwent  
587 plasmid prep using the GenElute™ Plasmid Miniprep Kit (Sigma-Aldrich, Australia) and the complement-  
588 containing plasmid was electroporated into the knockout mutant as per the protocol above.

589 **Capsule quantification and observation.** Quantification of surface polysaccharides was performed  
590 following the published protocol of the sulfuric acid-phenol reaction (39). For qualitative observation of capsule  
591 thickness, a Maneval's capsule stain was performed using a bacterial colony mixed with one drop of Congo  
592 Red (1% aqueous) on a clean glass slide. After drying, the slide was flooded with Maneval's modified stain for  
593 1 min, washed with water and blotted dry. Slides were observed using light microscopy under oil immersion.  
594 For scanning electron microscopy (SEM) imaging of the surface of bacterial hosts, a 20 μl droplet of 5 times-  
595 PBS washed bacterial suspension was placed onto a fresh gold-coated silicon wafer (5 x 5 mm) and the cells  
596 allowed to settle for 5 min, followed by washing with PBS. The wafer was then placed in 2.5% glutaraldehyde

597 in PBS solution for 15 min, washed with deionized water and dehydrated by immersing in increasing  
598 concentrations of ethanol for 3 minutes each. Residual ethanol was removed with a critical point dryer CPD 030  
599 (BAL-TEC AG, Liechtenstein). The sample was mounted on a standard metal SEM stub and then coated with  
600 a ~10 nm thick gold layer using a sputter coater SCD 005 (BAL-TEC AG, Liechtenstein). The samples were  
601 examined under high vacuum within the FE-SEM ThermoFisher Elstar G4 at an accelerating voltage of 2 kV,  
602 secondary electron mode (SE), and a working distance of 4 mm, operating in immersion mode with the through  
603 lens detector (TLD).

604 **Biofilm formation assay.** 48 h biofilm formation on polystyrene 96-well plates was assessed using  
605 crystal violet staining and spectrophotometry as previously described (78).

606 **Serum killing assay.** From overnight cultures of the strains, a 1:100 subculture was made and  
607 incubated to reach mid-exponential phase (approximately 2-3 h). Meanwhile, the working volume of human  
608 serum (Sigma-Aldrich, Australia) was divided in half, storing one half at 4 °C and heat-inactivating the other half  
609 at 56 °C for 30 min. After incubation, the cells of each culture were harvested via centrifugation, washed, and  
610 resuspended in PBS, then standardized to an OD<sub>600</sub> of 0.3. Active or heat-inactivated human serum was then  
611 diluted in PBS to a 50% solution. In a glass test tube, 50% serum/PBS was inoculated with 10<sup>5</sup> CFU of bacteria,  
612 mixed and incubated. At regular intervals, samples from each culture were extracted to perform serial dilutions  
613 and CFU counts. *E. coli* DH5- $\alpha$  was used as a control of serum activity, as it is highly susceptible to human  
614 serum but resistant to heat-inactivated serum.

615 **Antibiotic susceptibility assay.** Minimum inhibitory concentrations (MICs) of 7 antibiotics were  
616 assessed using the microbroth dilution protocol, as previously described (79) and interpreted using the cut-off  
617 values from the Clinical and Laboratory Standard Institute. The antibiotics used were: ampicillin/sulbactam  
618 (SAM), ceftazidime (CFZ), imipenem (IPM), gentamicin (GEN), amikacin (AMK), minocycline (MIN), and  
619 ciprofloxacin (CIP) (Sigma-Aldrich, Australia). Size of the bacterial inoculum for each test was standardized at  
620 10<sup>5</sup> CFU, in a volume of 200  $\mu$ l per test. *E. coli* strains ATCC 25922 and ATCC 35218 were used as quality  
621 controls for each batch of microbroth dilution tests.

622 **Animal experiments and animal ethics.** Four female, 6-to-10 weeks old, BALB/c mice per group were  
623 used. Bacterial inoculums of either wild type or phage-resistant *A. baumannii* were prepared to a concentration  
624 of 10<sup>6</sup> CFU in 100  $\mu$ l of PBS. Before administration, the bacterial suspensions were mixed in a 1:1 ratio with 6%  
625 porcine stomach mucin (Sigma-Aldrich, Australia) in PBS, for a total volume of 200  $\mu$ l. Mice were injected  
626 intraperitoneally and followed for up to 8 h. At the humane endpoint, blood was extracted through cardiac  
627 puncture and a laparotomy was performed to obtain a section of the liver, the right kidney, and spleen. The  
628 organs were weighed and then homogenized in PBS. Blood and organ suspensions were then serially diluted  
629 in PBS (from 10<sup>-1</sup> to 10<sup>-5</sup>) and the bacterial burden quantified by CFU counting, and normalized by organ weight.  
630 All protocols involving animals were reviewed and approved by the Monash University Animal Ethics Committee  
631 (Project ID: E/1689/2016/M) and complied with the National Health and Medical Research Council guidelines.  
632 Animals were housed at the Monash Animal Research Facility, Monash University.

633 **Graphing and statistics.** Graphing and statistical analyses were performed with GraphPad Prism 7  
634 (GraphPad Software, Inc.). All *in vitro* experiments were performed in triplicate, with at least two technical  
635 replicates each. Where appropriate, scatter plots and medians were presented (80). Both parametric and  
636 nonparametric statistical analyses were performed, and the threshold value of two-tailed  $p < 0.05$  used for  
637 statistical significance.

638

## 639 Acknowledgements

640 We acknowledge expert advice and input from Laura Perlaza-Jiménez and Rhys Dunstan in the early stage of this  
641 project. We also gratefully acknowledge the use of facilities within the Monash Ramaciotti Cryo EM platform, as well as Dr  
642 Alex Fulcher from Monash Micro Imaging, and A/Prof Alex de Marco for granting access to the SEM. Christian Vázquez  
643 provided feedback regarding the readability, clarity, and structure of the manuscript.

644 Fernando L. Gordillo Altamirano acknowledges the support received from Monash University through the Monash  
645 Postgraduate Research Scholarships funding his doctoral studies. Trevor J. Lithgow is an ARC Australian Laureate Fellow  
646 (FL130100038). This work, including the efforts of Jeremy J. Barr, was funded by the National Health and Medical Research  
647 Council (NHMRC: 1156588), and the Perpetual Trustees Australia award (2018HIG00007).

## 649 Author Contributions

650 Conceptualization: FGA, TJL, AYP, JJB; Methodology: FGA, JHF, RP, XK, MT, SA, FM, DK, JJB; Formal Analysis:  
651 SA; Investigation: FGA, JHF, RP, XK, MT, DS, CO, LK, DK; Resources: MKO'B, TJL, AYP, JJB; Writing – Original Draft  
652 Preparation: FGA, JJB; Writing – Review and Editing: FGA, JHF, RP, XK, MT, DS, SA, FM, CO, LK, DK, MKO'B, TJL, AYP,  
653 JJB; Supervision and Funding Acquisition: TJL, AYP, JJB.

## 655 References

- 656 1. World Health Organization. Ten threats to global health in 2019 [internet]. Geneva: World Health Organization; 2019  
657 [cited 11 January 2020] Available from: <https://www.who.int/emergencies/ten-threats-to-global-health-in-2019>.
- 658 2. Cosgrove SE. The relationship between antimicrobial resistance and patient outcomes: mortality, length of hospital  
659 stay, and health care costs. *Clin Infect Dis*. 2006;42(Suppl2):S82-S89.
- 660 3. Naylor NR, Atun R, Zhu N, Kulasabanathan K, Silva S, Chatterjee A, et al. Estimating the burden of antimicrobial  
661 resistance: a systematic literature review. *Antimicrob Resist Infect Control*. 2018;7:58.
- 662 4. Centers for Disease Control and Prevention. Antibiotic resistance threats in the United States [internet]. Atlanta, GA,  
663 USA: Department of Health and Human Services CDC; 2019 [cited 11 January 2020] Available from:  
664 <https://www.cdc.gov/drugresistance/Biggest-Threats.html>
- 665 5. World Health Organization. Global priority list of antibiotic-resistant bacteria to guide research, discovery, and  
666 development of new antibiotics [internet]. Geneva: World Health Organization; 2017 p. 5. Available from:  
667 [https://www.who.int/medicines/publications/WHO-PPL-Short\\_Summary\\_25Feb-ET\\_NM\\_WHO.pdf](https://www.who.int/medicines/publications/WHO-PPL-Short_Summary_25Feb-ET_NM_WHO.pdf)
- 668 6. Pendleton JN, Gorman SP, Gilmore BF. Clinical relevance of the ESKAPE pathogens. *Expert Rev Anti Infect Ther*.  
669 2013;11:297-308.
- 670 7. Chapartegui-González I, Lázaro-Díez M, Bravo Z, Navas J, Icardo JM, Ramos-Vivas J. *Acinetobacter baumannii*  
671 maintains its virulence after long-time starvation. *PLoS one*. 2018;13:e0201961.
- 672 8. Peleg AY, Seifert H, Paterson DL. *Acinetobacter baumannii*: emergence of a successful pathogen. *Clin Microbiol*  
673 *Reviews*. 2008;21:538-582.
- 674 9. Vincent JL, Rello J, Marshall J, Silva E, Anzueto A, Martin CD, et al. International study of the prevalence and  
675 outcomes of infection in intensive care units. *JAMA*. 2009;302:2323-2329.
- 676 10. Morris FC, Dexter C, Kostoulias X, Uddin MI, Peleg AY. The mechanisms of disease caused by *Acinetobacter*  
677 *baumannii*. *Front Microbiol*. 2019;10:1601.
- 678 11. Geisinger E, Huo W, Hernandez-Bird J, Isberg RR. *Acinetobacter baumannii*: envelope determinants that control drug  
679 resistance, virulence, and surface variability. *Annu Rev Microbiol*. 2019;73:481-506.
- 680 12. Salwiczek M, Qu Y, Gardiner J, Strugnell RA, Lithgow T, McLean KM, et al. Emerging rules for effective antimicrobial  
681 coatings. *Trends Biotechnol*. 2014;32:82-90.
- 682 13. Davenport EK, Call DR, Beyenal H. Differential protection from tobramycin by extracellular polymeric substances from  
683 *Acinetobacter baumannii* and *Staphylococcus aureus* biofilms. *Antimicrob Agents Chemother*. 2014;58:4755-4761.
- 684 14. Longo F, Vuotto C, Donelli G. Biofilm formation in *Acinetobacter baumannii*. *New Microbiol*. 2014;37:119-127.

- 685 15. Ryu SY, Baek W-K, Kim HA. Association of biofilm production with colonization among clinical isolates of  
686 *Acinetobacter baumannii*. *Korean J Intern Med*. 2017;32:345-351.
- 687 16. Singh JK, Adams FG, Brown MH. Diversity and function of capsular polysaccharide in *Acinetobacter baumannii*. *Front*  
688 *Microbiol*. 2019;9:3301.
- 689 17. Gordillo Altamirano FL, Barr JJ. Phage therapy in the postantibiotic era. *Clin Microbiol Rev*. 2019;32:e00066-18.
- 690 18. Viertel TM, Ritter K, Horz H-P. Viruses versus bacteria—novel approaches to phage therapy as a tool against  
691 multidrug-resistant pathogens. *J Antimicrob Chemother*. 2014;69:2326-2336.
- 692 19. Hua Y, Luo T, Yang Y, Dong D, Wang R, Wang Y, et al. Phage therapy as a promising new treatment for lung  
693 infection caused by carbapenem-resistant *Acinetobacter baumannii* in mice. *Front Microbiol*. 2017;8:2659.
- 694 20. Wang JL, Kuo CF, Yeh CM, Chen JR, Cheng MF, Hung CH. Efficacy of phikm18p phage therapy in a murine model  
695 of extensively drug-resistant *Acinetobacter baumannii* infection. *Infect Drug Resist*. 2018;11:2301-2310.
- 696 21. Yin S, Huang G, Zhang Y, Jiang B, Yang Z, Dong Z, et al. Phage Abp1 rescues human cells and mice from infection  
697 by pan-drug resistant *Acinetobacter baumannii*. *Cell Physiol Biochem*. 2017;44:2337-2345.
- 698 22. Schooley RT, Biswas B, Gill JJ, Hernandez-Morales A, Lancaster J, Lessor L, et al. Development and use of  
699 personalized bacteriophage-based therapeutic cocktails to treat a patient with a disseminated resistant *Acinetobacter*  
700 *baumannii* infection. *Antimicrob Agents Chemother*. 2017;61:e00954-17.
- 701 23. Wyres KL, Cahill SM, Holt KE, Hall RM, Kenyon JJ. Identification of *Acinetobacter baumannii* loci for capsular  
702 polysaccharide (KL) and lipooligosaccharide outer core (OCL) synthesis in genome assemblies using curated  
703 reference databases compatible with Kaptive. *bioRxiv*. 2019:869370.
- 704 24. Golkar Z, Bagasra O, Pace DG. Bacteriophage therapy: a potential solution for the antibiotic resistance crisis. *J Infect*  
705 *Dev Ctries*. 2014;8:129-136.
- 706 25. Labrie SJ, Samson JE, Moineau S. Bacteriophage resistance mechanisms. *Nature Rev Microbiol*. 2010;8:317-327.
- 707 26. Torres-Barcelo C, Hochberg ME. Evolutionary rationale for phages as complements of antibiotics. *Trends Microbiol*.  
708 2016;24:249-256.
- 709 27. León M, Bastías R. Virulence reduction in bacteriophage resistant bacteria. *Front Microbiol*. 2015;6:343.
- 710 28. Capparelli R, Nocerino N, Lanzetta R, Silipo A, Amoresano A, Giangrande C, et al. Bacteriophage-resistant  
711 *Staphylococcus aureus* mutant confers broad immunity against staphylococcal infection in mice. *PLoS One*.  
712 2010;5:e11720.
- 713 29. Capparelli R, Nocerino N, Iannaccone M, Ercolini D, Parlato M, Chiara M, et al. Bacteriophage therapy of *Salmonella*  
714 *enterica*: a fresh appraisal of bacteriophage therapy. *J Infect Dis*. 2010;201:52-61.
- 715 30. Chan BK, Sistrom M, Wertz JE, Kortright KE, Narayan D, Turner PE. Phage selection restores antibiotic sensitivity in  
716 MDR *Pseudomonas aeruginosa*. *Sci Rep*. 2016;6:26717.
- 717 31. Adams MD, Goglin K, Molyneaux N, Hujer KM, Lavender H, Jamison JJ, et al. Comparative genome sequence  
718 analysis of multidrug-resistant *Acinetobacter baumannii*. *J Bacteriol*. 2008;190:8053-8064.
- 719 32. Hawkey J, Ascher DB, Judd LM, Wick RR, Kostoulas X, Cleland H, et al. Evolution of carbapenem resistance in  
720 *Acinetobacter baumannii* during a prolonged infection. *Microbial Genom*. 2018;4. doi: 10.1099/mgen.0.000165.
- 721 33. Peleg AY, Tampakakis E, Fuchs BB, Eliopoulos GM, Moellering RC, Mylonakis E. Prokaryote–eukaryote interactions  
722 identified by using *Caenorhabditis elegans*. *Proc Natl Acad Sci USA*. 2008;105:14585-14590.
- 723 34. Jacobs AC, Thompson MG, Black CC, Kessler JL, Clark LP, McQueary CN, et al. AB5075, a highly virulent isolate of  
724 *Acinetobacter baumannii*, as a model strain for the evaluation of pathogenesis and antimicrobial treatments. *mBio*.  
725 2014;5:e01076-14.
- 726 35. Schaub IG, Hauber FD. A Biochemical and serological study of a group of identical unidentifiable gram-negative  
727 bacilli from human sources. *J Bacteriol*. 1948;56:379-385.
- 728 36. Bonilla N, Rojas MI, Netto Flores Cruz G, Hung S-H, Rohwer F, Barr JJ. Phage on tap—a quick and efficient protocol  
729 for the preparation of bacteriophage laboratory stocks. *PeerJ*. 2016;4:e2261.
- 730 37. Kieft K, Zhou Z, Anantharaman K. VIBRANT: Automated recovery, annotation and curation of microbial viruses, and  
731 evaluation of virome function from genomic sequences. *bioRxiv*. 2019:855387.

- 732 38. Kenyon JJ, Hall RM. Variation in the complex carbohydrate biosynthesis loci of *Acinetobacter baumannii* genomes.  
733 *PLoS One*. 2013;8:e62160.
- 734 39. Brimacombe C, Beatty J. Surface polysaccharide extraction and quantification. *Bio Protoc*. 2013;3:e934.
- 735 40. Russo TA, Luke NR, Beanan JM, Olson R, Sauberan SL, MacDonald U, et al. The K1 capsular polysaccharide of  
736 *Acinetobacter baumannii* strain 307-0294 is a major virulence factor. *Infect Immun*. 2010;78:3993-4000.
- 737 41. Wang-Lin SX, Olson R, Beanan JM, MacDonald U, Balthasar JP, Russo TA. The capsular polysaccharide of  
738 *Acinetobacter baumannii* is an obstacle for therapeutic passive immunization strategies. *Infect Immun*.  
739 2017;85:e00591-17.
- 740 42. Oechslin F. Resistance development to bacteriophages occurring during bacteriophage therapy. *Viruses*.  
741 2018;10:351.
- 742 43. Kenyon JJ, Shashkov AS, Senchenkova SyN, Shneider MM, Liu B, Popova AV, et al. *Acinetobacter baumannii* K11  
743 and K83 capsular polysaccharides have the same 6-deoxy-L-talose-containing pentasaccharide K units but different  
744 linkages between the K units. *Int J Biol Macromol*. 2017;103:648-655.
- 745 44. Kenyon JJ, Marzaioli AM, Hall RM, De Castro C. Structure of the K2 capsule associated with the KL2 gene cluster of  
746 *Acinetobacter baumannii*. *Glycobiology*. 2014;24:554-63.
- 747 45. Sørensen MCH, van Alphen LB, Harboe A, Li J, Christensen BB, Szymanski CM, et al. Bacteriophage F336  
748 recognizes the capsular phosphoramidate modification of *Campylobacter jejuni* NCTC11168. *J Bacteriol*.  
749 2011;193:6742-6749.
- 750 46. Pickard D, Toribio AL, Petty NK, van Tonder A, Yu L, Goulding D, et al. A conserved acetyl esterase domain targets  
751 diverse bacteriophages to the Vi capsular receptor of *Salmonella enterica* serovar Typhi. *J Bacteriol*. 2010;192:5746-  
752 5754.
- 753 47. Hsu C-R, Lin T-L, Pan Y-J, Hsieh P-F, Wang J-T. Isolation of a bacteriophage specific for a new capsular type of  
754 *Klebsiella pneumoniae* and characterization of its polysaccharide depolymerase. *PLoS One*. 2013;8:e70092.
- 755 48. Schumacher A, Vranken T, Malhotra A, Arts JJC, Habibovic P. *In vitro* antimicrobial susceptibility testing methods:  
756 agar dilution to 3D tissue-engineered models. *Eur J Clin Microbiol Infect Dis*. 2018;37:187-208.
- 757 49. Humphries JC. Enzymic activity of bacteriophage-culture lysates: I. A capsule lysin active against *Klebsiella*  
758 *pneumoniae* type A. *J Bacteriol*. 1948;56:683-693.
- 759 50. Henderson B, Martin A. Bacterial virulence in the moonlight: multitasking bacterial moonlighting proteins are virulence  
760 determinants in infectious disease. *Infect Immun*. 2011;79:3476-3491.
- 761 51. Boinett CJ, Cain AK, Hawkey J, Do Hoang NT, Khanh NNT, Thanh DP, et al. Clinical and laboratory-induced colistin-  
762 resistance mechanisms in *Acinetobacter baumannii*. *Microb Genom*. 2019;5:e000246.
- 763 52. Zhang P, Wei D, Li Z, Sun Z, Pan J, Zhu X. Cryptococcal phosphoglucose isomerase is required for virulence factor  
764 production, cell wall integrity and stress resistance. *FEMS Yeast Res*. 2015;15:fov072.
- 765 53. Tsuge S, Ochiai H, Inoue Y, Oku T, Tsuno K, Kaku H, et al. Involvement of phosphoglucose isomerase in  
766 pathogenicity of *Xanthomonas oryzae* pv. *oryzae*. *Phytopathology*. 2004;94:478-483.
- 767 54. Lai M-J, Chang K-C, Huang S-W, Luo C-H, Chiou P-Y, Wu C-C, et al. The tail associated protein of *Acinetobacter*  
768 *baumannii* phage ΦAB6 is the host specificity determinant possessing exopolysaccharide depolymerase activity.  
769 *PLoS One*. 2016;11:e0153361.
- 770 55. Popova AV, Lavysh DG, Klimuk EI, Edelstein MV, Bogun AG, Shneider MM, et al. Novel Fri1-like viruses infecting  
771 *Acinetobacter baumannii*-vB\_AbaP\_AS11 and vB\_AbaP\_AS12-characterization, comparative genomic analysis, and  
772 host-recognition strategy. *Viruses*. 2017;9:188.
- 773 56. Kutter E. Phage host range and efficiency of plating. *Methods Mol Biol*. 2009;501:141-149.
- 774 57. Davison E, Colquhoun W. Ultrathin formvar support films for transmission electron microscopy. *J Electron Microsc*  
775 *Tech*. 1985;2:35-43.
- 776 58. Dunstan RA, Pickard D, Dougan S, Goulding D, Cormie C, Hardy J, et al. The flagellotropic bacteriophage YSD1  
777 targets *Salmonella* Typhi with a Chi-like protein tail fibre. *Mol Microbiol*. 2019;112:1831-1846.

- 778 59. Wick RR, Judd LM, Holt KE. Deepbinner: Demultiplexing barcoded Oxford Nanopore reads with deep convolutional  
779 neural networks. *PLoS Comput Biol*. 2018;14:e1006583.
- 780 60. Bolger AM, Lohse M, Usadel B. Trimmomatic: a flexible trimmer for Illumina sequence data. *Bioinformatics*.  
781 2014;30:2114-2120.
- 782 61. Wick RR, Judd LM, Gorrie CL, Holt KE. Unicycler: Resolving bacterial genome assemblies from short and long  
783 sequencing reads. *PLoS Comput Biol*. 2017;13:e1005595.
- 784 62. Aziz RK, Bartels D, Best AA, DeJongh M, Disz T, Edwards RA, et al. The RAST Server: rapid annotations using  
785 subsystems technology. *BMC Genomics*. 2008;9:75. doi: 10.1186/1471-2164-9-75
- 786 63. Arndt D, Grant JR, Marcu A, Sajed T, Pon A, Liang Y, et al. PHASTER: a better, faster version of the PHAST phage  
787 search tool. *Nucleic Acids Res*. 2016;44(W1):W16-W21.
- 788 64. Pope W, Sarkis G, Hatfull G, Broussard G. Lysogeny experiments [internet]. Pittsburg, PA, USA: The  
789 Actinobacteriophage Database at PhagesDB.org; 2013 [cited 30 January 2020] Available from:  
790 [https://phagesdb.org/media/workflow/protocols/pdfs/LysogenyProtocol\\_3.19.13.pdf](https://phagesdb.org/media/workflow/protocols/pdfs/LysogenyProtocol_3.19.13.pdf)
- 791 65. Boling L, Cuevas DA, Grasis JA, Kang HS, Knowles B, Levi K, et al. Dietary prophage inducers and antimicrobials:  
792 toward landscaping the human gut microbiome. *Gut Microbes*. 2020;13:1-14.
- 793 66. Gillis A, Mahillon J. An improved method for rapid generation and screening of *Bacillus thuringiensis* phage-resistant  
794 mutants. *J Microbiol Methods*. 2014;106:101-103.
- 795 67. Nurk S, Bankevich A, Antipov D, Gurevich AA, Korobeynikov A, Lapidus A, et al. Assembling single-cell genomes and  
796 mini-metagenomes from chimeric MDA products. *J Comput Biol*. 2013;20:714-737.
- 797 68. Li H. Aligning sequence reads, clone sequences and assembly contigs with BWA-MEM. *arXiv*. 2013;arXiv:13033997.
- 798 69. Tsyganov K, James Perry A, Kenneth Archer S, Powell D. RNAsik: A Pipeline for complete and reproducible RNA-seq  
799 analysis that runs anywhere with speed and ease. *J Open Source Softw*. 2018;3:583.
- 800 70. Koboldt DC, Zhang Q, Larson DE, Shen D, McLellan MD, Lin L, et al. VarScan 2: somatic mutation and copy number  
801 alteration discovery in cancer by exome sequencing. *Genome Res*. 2012;22:568-576.
- 802 71. Robinson JT, Thorvaldsdottir H, Wenger AM, Zehir A, Mesirov JP. Variant review with the integrative genomics  
803 viewer. *Cancer Res*. 2017;77:e31-e34.
- 804 72. Seemann T. Prokka: rapid prokaryotic genome annotation. *Bioinformatics*. 2014;30:2068-2069.
- 805 73. Page AJ, Cummins CA, Hunt M, Wong VK, Reuter S, Holden MT, et al. Roary: rapid large-scale prokaryote pan  
806 genome analysis. *Bioinformatics*. 2015;31:3691-3693.
- 807 74. Stamatakis A. RAxML version 8: a tool for phylogenetic analysis and post-analysis of large phylogenies.  
808 *Bioinformatics*. 2014;30:1312-1313.
- 809 75. Paradis E, Schliep K. ape 5.0: an environment for modern phylogenetics and evolutionary analyses in R.  
810 *Bioinformatics*. 2019;35:526-528.
- 811 76. Datsenko KA, Wanner BL. One-step inactivation of chromosomal genes in *Escherichia coli* K-12 using PCR products.  
812 *Proc Natl Acad Sci*. 2000;97:6640.
- 813 77. Choi AH, Slamti L, Avci FY, Pier GB, Maira-Litran T. The pgaABCD locus of *Acinetobacter baumannii* encodes the  
814 production of poly-beta-1-6-N-acetylglucosamine, which is critical for biofilm formation. *J Bacteriol*. 2009;191:5953-  
815 5963.
- 816 78. O'Toole GA, Pratt LA, Watnick PI, Newman DK, Weaver VB, Kolter R. Genetic approaches to study of biofilms.  
817 *Methods Enzymol*. 1999;310:91-109.
- 818 79. Wiegand I, Hilpert K, Hancock RE. Agar and broth dilution methods to determine the minimal inhibitory concentration  
819 (MIC) of antimicrobial substances. *Nat Protoc*. 2008;3:163-175.
- 820 80. Weissgerber TL, Milic NM, Winham SJ, Garovic VD. Beyond bar and line graphs: time for a new data presentation  
821 paradigm. *PLoS Biol*. 2015;13:e1002128.
- 822

823 **Supplementary Information**

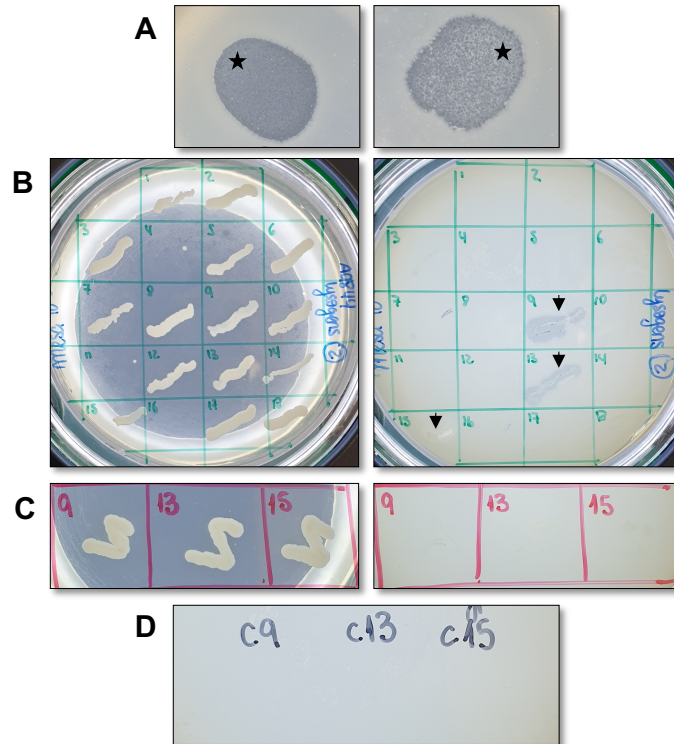

824

825 **Figure S1.** Attempted production of A9844 lysogens. A: Spot assay with droplets containing  $10^6$  (left) and  $10^4$  (right) PFU of  
826  $\phi$ CO01 after 48 h of incubation. Black stars denote the zones of lysis containing cloudy bacterial growth. B: Patch assay.  
827 Bacterial growth scraped off from the lysis zones was streaked-plated and individual colonies were patched onto LB (left)  
828 and LB with an A9844 overlay (right) plates. Black arrows (colonies 9, 13 and 15) show bacterial growth with surrounding  
829 lysis, indicating the presence of phage  $\phi$ CO01, possibly released from a lysogen. Panel only shows 18/36 screened colonies.  
830 C: After three rounds of single-colony purification, the patch test was repeated for colonies 9, 13 and 15, without indication  
831 of phage presence. D: Spot assay performed with the filtered supernatant from cultures of colonies 9, 13 and 15, with no  
832 indication of spontaneous phage release.

833

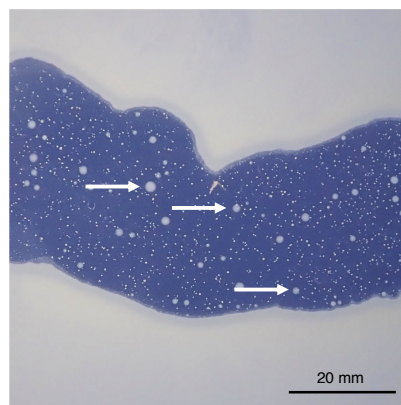

834

835 **Figure S2.** Spot assay of strain A9844 with phage  $\phi$ CO01, showing the large central lysis zone, with several bacterial  
836 colonies growing within (white arrowheads). These colonies were assumed to be phage-resistant and underwent the pipeline  
837 for confirming this phenotype.

838

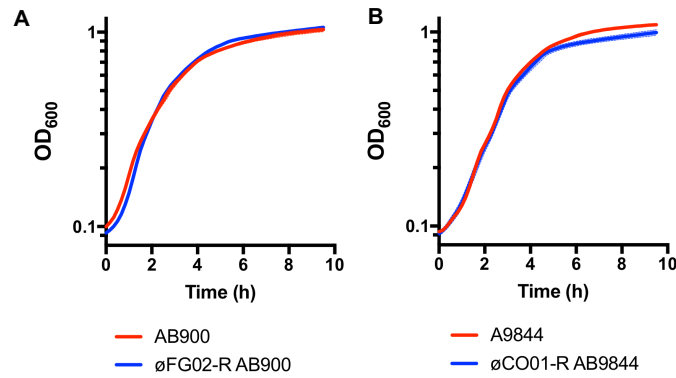

839

840

841

842

**Figure S3.** Growth curves of *A. baumannii* strains AB900 and A9844 (red) and their phage-resistant mutants øFG02-R AB900 and øCO01-R A9844 (blue) in the absence of phages. Shaded zones represent SD (n = 3).

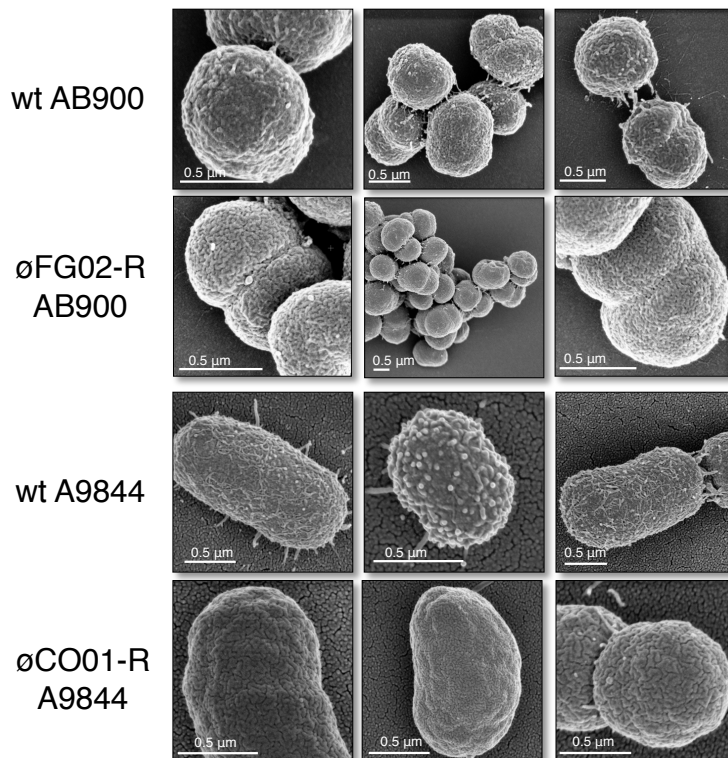

843

844

**Figure S4.** Additional scanning electron microscopy images of the wild type and phage-resistant strains in this study.

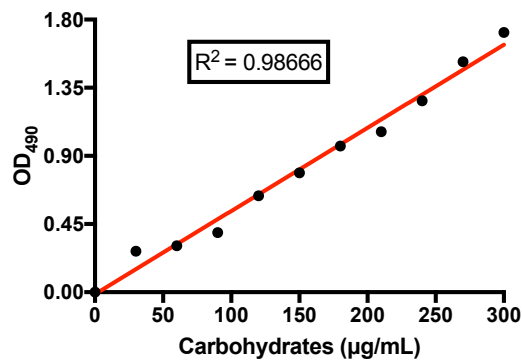

845

846

847

848

849

**Figure S5.** Standard curve for the capsule quantification assay. Carbohydrate standards were prepared by diluting a carbohydrate stock solution (50:50 mixture of 0.5 mg/ml each of sucrose and fructose) into 1 ml aliquots ranging from 0 to 300 µg/ml of carbohydrate using distilled water. The standards were treated with the phenol-chloroform reaction, and the absorbance measured at OD<sub>490</sub>.



850 **Table S1.** Raw data of minimum inhibitory concentrations (MIC) in  $\mu\text{g/ml}$  from the antibiotic resistance panel of  
 851 AB900, A9844,  $\emptyset\text{FG02-R AB900}$  and  $\emptyset\text{CO01-R A9844}$ . MICs determined via the microbroth dilution method.  
 852

|                        | <b>AB900</b>      |             |          | <b><math>\emptyset\text{FG02-R AB900}</math></b> |             |          |
|------------------------|-------------------|-------------|----------|--------------------------------------------------|-------------|----------|
|                        | <b>Replicates</b> |             |          | <b>Replicates</b>                                |             |          |
|                        | <b>1</b>          | <b>2</b>    | <b>3</b> | <b>1</b>                                         | <b>2</b>    | <b>3</b> |
| Ampicillin + Sulbactam | 2/1               | 8/4         | 4/2      | 2/1                                              | 4/2         | 2/1      |
| Ceftazidime            | >32               | >32         | 8        | 2                                                | 2           | 1        |
| Imipenem               | 0.12              | 0.12        | 0.25     | $\leq 0.06$                                      | $\leq 0.06$ | 0.25     |
| Ciprofloxacin          | 0.5               | 0.25        | 0.25     | 0.25                                             | 0.12        | 0.25     |
| Amikacin               | 2                 | 1           | 4        | $\leq 0.25$                                      | 1           | 4        |
| Gentamicin             | 0.5               | 0.5         | 1        | 0.5                                              | 0.5         | 0.5      |
| Minocycline            | $\leq 0.12$       | $\leq 0.12$ | 0.25     | $\leq 0.12$                                      | $\leq 0.12$ | 0.25     |
|                        | <b>A9844</b>      |             |          | <b><math>\emptyset\text{CO01-R A9844}</math></b> |             |          |
|                        | <b>Replicates</b> |             |          | <b>Replicates</b>                                |             |          |
|                        | <b>1</b>          | <b>2</b>    | <b>3</b> | <b>1</b>                                         | <b>2</b>    | <b>3</b> |
| Ampicillin + Sulbactam | 16/8              | 16/8        | 16/8     | 8/4                                              | 8/4         | 16/8     |
| Ceftazidime            | >16               | 64          | 64       | >16                                              | 32          | 64       |
| Imipenem               | 8                 | >32         | 32       | 8                                                | 16          | 32       |
| Ciprofloxacin          | >8                | >8          | >8       | >8                                               | >8          | >8       |
| Amikacin               | 0.25              | $\leq 0.25$ | 2        | 0.5                                              | 2           | 0.25     |
| Gentamicin             | 2                 | 1           | 0.5      | 2                                                | 0.5         | 2        |
| Minocycline            | 2                 | 2           | 2        | 2                                                | 1           | 1        |

853  
854

855  
856

**Table S2.** Strains and plasmids used in this study

| Name                                          | Description/Use                                                                                                                                           | Reference / Source |
|-----------------------------------------------|-----------------------------------------------------------------------------------------------------------------------------------------------------------|--------------------|
| <b><i>Acinetobacter baumannii</i> strains</b> |                                                                                                                                                           |                    |
| AB900                                         | Wild type, sensitive to $\emptyset$ FG02                                                                                                                  | (31)               |
| $\emptyset$ FG02-R AB900                      | Obtained <i>in vitro</i> , resistant to $\emptyset$ FG02                                                                                                  | This study         |
| $\Delta$ gtr29 AB900                          | Disruption of gene <i>gtr29</i> , resistant to $\emptyset$ FG02                                                                                           | This study         |
| $\Delta$ gtr29 (pBAD19) AB900                 | Complemented AB900 <i>gtr29</i> mutant, with <i>gtr29</i> supplied <i>in trans</i> (pBAD19)                                                               | This study         |
| A9844                                         | Wild type, sensitive to $\emptyset$ CO01                                                                                                                  | (33)               |
| $\emptyset$ CO01-R A9844                      | Obtained <i>in vitro</i> , resistant to $\emptyset$ CO01                                                                                                  | This study         |
| $\Delta$ gpi A9844                            | Disruption of gene <i>gpi</i> , resistant to $\emptyset$ CO01                                                                                             | This study         |
| $\Delta$ gpi (pBAD20) A9844                   | Complemented A9844 <i>gpi</i> mutant, with <i>gpi</i> supplied <i>in trans</i> (pBAD20)                                                                   | This study         |
| ATCC 19606                                    | Reference strain, originally from a urinary tract infection.                                                                                              | (35)               |
| ATCC 17978                                    | Reference strain, originally from a case of spinal meningitis.                                                                                            | (31)               |
| AB5075                                        | Clinical strain, from an osteomyelitis case.                                                                                                              | (34)               |
| AB307-0294                                    | Clinical strain, from a bloodstream infection.                                                                                                            | (31)               |
| APA1                                          | Clinical strain, from a burn wound infection.                                                                                                             | (32)               |
| APA2                                          | Clinical strain, from a burn wound infection.                                                                                                             | (32)               |
| AYP A22                                       | Clinical strain, from a burn wound infection.                                                                                                             | (32)               |
| <b><i>Escherichia coli</i> strains</b>        |                                                                                                                                                           |                    |
| DH5- $\alpha$                                 | Receptor for production of plasmids pBAD19 and pBAD20; control for complement system activity in serum killing assay.                                     | Commercial         |
| ATCC 25922                                    | Quality control in microbroth dilution antibiotic sensitivity tests.                                                                                      | Commercial         |
| ATCC 35218                                    | Quality control in microbroth dilution antibiotic sensitivity tests.                                                                                      | Commercial         |
| <b><i>Enterococcus faecium</i> strains</b>    |                                                                                                                                                           |                    |
| ATCC 29212                                    | Growth control on inverted spot assays.                                                                                                                   | Commercial         |
| <b>Plasmids</b>                               |                                                                                                                                                           |                    |
| pKD4                                          | Source of the kanamycin-resistance cassette.                                                                                                              | (76)               |
| pBAD18Kan-Ori                                 | Shuttle vector containing ABori for replication in <i>A. baumannii</i> , with araBAD promoter                                                             | (77)               |
| pBAD19                                        | pBAD18Kan-Ori with a copy of <i>gtr29</i> from AB900, cloned in between <i>EcoRI</i> and <i>Sall</i> restriction sites, under control of promoter araBAD. | This study         |
| pBAD20                                        | pBAD18Kan-Ori with a copy of <i>gpi</i> from A9844, cloned in at <i>Sall</i> restriction sites, under control of promoter araBAD.                         | This study         |

857  
858

859  
860

**Table S3.** Genome assembly sources for the phylogenetic analysis of *A. baumannii* strains.

| Strain     | Source                                                                                                                                                                                                                                                                                                          |
|------------|-----------------------------------------------------------------------------------------------------------------------------------------------------------------------------------------------------------------------------------------------------------------------------------------------------------------|
| AB900      | De novo assembly, from this study; and<br><a href="ftp://ftp.ncbi.nlm.nih.gov/genomes/all/GCA/000/173/395/GCA_000173395.1_ASM17339v1/GCA_000173395.1_ASM17339v1_genomic.fna.gz">ftp://ftp.ncbi.nlm.nih.gov/genomes/all/GCA/000/173/395/GCA_000173395.1_ASM17339v1/GCA_000173395.1_ASM17339v1_genomic.fna.gz</a> |
| A9844      | De novo assembly, from this study.                                                                                                                                                                                                                                                                              |
| ATCC 19606 | <a href="ftp://ftp.ncbi.nlm.nih.gov/genomes/all/GCA/000/737/145/GCA_000737145.1_ASM73714v1/GCA_000737145.1_ASM73714v1_genomic.fna.gz">ftp://ftp.ncbi.nlm.nih.gov/genomes/all/GCA/000/737/145/GCA_000737145.1_ASM73714v1/GCA_000737145.1_ASM73714v1_genomic.fna.gz</a>                                           |
| ATCC 17978 | <a href="ftp://ftp.ncbi.nlm.nih.gov/genomes/all/GCA/001/077/675/GCA_001077675.1_ASM107767v1/GCA_001077675.1_ASM107767v1_genomic.fna.gz">ftp://ftp.ncbi.nlm.nih.gov/genomes/all/GCA/001/077/675/GCA_001077675.1_ASM107767v1/GCA_001077675.1_ASM107767v1_genomic.fna.gz</a>                                       |
| AB5075     | <a href="ftp://ftp.ncbi.nlm.nih.gov/genomes/all/GCF/000/963/815/GCF_000963815.1_ASM96381v1/GCF_000963815.1_ASM96381v1_genomic.fna.gz">ftp://ftp.ncbi.nlm.nih.gov/genomes/all/GCF/000/963/815/GCF_000963815.1_ASM96381v1/GCF_000963815.1_ASM96381v1_genomic.fna.gz</a>                                           |
| AB307-0294 | <a href="ftp://ftp.ncbi.nlm.nih.gov/genomes/all/GCA/002/803/025/GCA_002803025.1_ASM280302v1/GCA_002803025.1_ASM280302v1_genomic.fna.gz">ftp://ftp.ncbi.nlm.nih.gov/genomes/all/GCA/002/803/025/GCA_002803025.1_ASM280302v1/GCA_002803025.1_ASM280302v1_genomic.fna.gz</a>                                       |
| APA1       | <a href="https://ndownloader.figshare.com/files/9042523">https://ndownloader.figshare.com/files/9042523</a>                                                                                                                                                                                                     |
| APA2       | <a href="https://ndownloader.figshare.com/files/9042526">https://ndownloader.figshare.com/files/9042526</a>                                                                                                                                                                                                     |
| AYP A22    | No assembly. Downloaded raw sequencing data from SRA, accession: SRR5891477                                                                                                                                                                                                                                     |

861  
862

863 **Table S4.** Primers used in the genetic engineering of *A. baumannii* strains AB900 and A9844 in this study. '/'  
864 indicates the addition of an extension sequence.

| Number                                           | Name              | Use                                                                                                             | Sequence (5'-3')                                  |
|--------------------------------------------------|-------------------|-----------------------------------------------------------------------------------------------------------------|---------------------------------------------------|
| <b>Construct for knocking out gtr29 in AB900</b> |                   |                                                                                                                 |                                                   |
| 1                                                | UPgtr29-FWD       | Upstream region of gtr29                                                                                        | GCTTCTTCTCGTTCAATATATGG                           |
| 2                                                | UPgtr29-RVS       | Upstream region of gtr29 / Extension with homology to KAN-FWD                                                   | CCCAGTAGCTGACATTCATCC / GTAGAATATACGAACACATTGAG   |
| 3                                                | KAN-FWD           | Amplification of the kanamycin resistance cassette from plasmid vector pKD4 (also used for the other construct) | GGATGAATGTCAGCTACTGGG                             |
| 4                                                | KAN-RVS           |                                                                                                                 | GAATCGAAATCTCGTGATGGCAG                           |
| 5                                                | DWNgtr29-FWD      | Downstream region of gtr29 / Extension with homology to KAN-RVS                                                 | CTGCCATCACGAGATTTGATTTC / GCTCAATTGATGGATGGTTAG   |
| 6                                                | DWNgtr29-RVS      | Downstream region of gtr29                                                                                      | GGAATTGACTTACTTGCTGGTAG                           |
| 7                                                | NESgtr29-FWD      | Nested primers for amplification of the final construct                                                         | GTTGTTTATCCGACTCAGAG                              |
| 8                                                | NESgtr29-RVS      |                                                                                                                 | CAAACCAGCAACAGGTAATATGG                           |
| 9                                                | SEQgtr29-FWD      | Confirmation of gene disruption via Sanger sequencing                                                           | GTTAATCGTGGTGAAGTTGTAC                            |
| 10                                               | SEQgtr29-RVS      |                                                                                                                 | GATACGCATGCATTCTAACAGG                            |
| <b>Construct for knocking out gpi in A9844</b>   |                   |                                                                                                                 |                                                   |
| 11                                               | UPgpi-FWD         | Upstream region of gpi                                                                                          | ACTATGCAAGAGCTGTTACGTCC                           |
| 12                                               | UPgpi-RVS         | Upstream region of gpi / Extension with homology to KAN-FWD                                                     | CCCAGTAGCTGACATTCATCC / ATAAGCGCTCAATCCAGTGAGTC   |
| 13                                               | DWNgpi-FWD        | Downstream region of gpi / Extension with homology to KAN-RVS                                                   | CTGCCATCACGAGATTTGATTTC / ATGCTTCAACACGTGGTTTGATT |
| 14                                               | DWNgpi-RVS        | Downstream region of gpi                                                                                        | CAGCTATCCTTAAGCATATCTTC                           |
| 15                                               | NESgpi-FWD        | Nested primers for amplification of the final construct                                                         | GCTGAATTTACAAAGCTCAGCA                            |
| 16                                               | NESgpi-RVS        |                                                                                                                 | TGCTCTACGTGGAGCGAACTCA                            |
| 17                                               | SEQgpi-FWD        | Confirmation of gene disruption via Sanger sequencing                                                           | CGCTTATGAAGGAGTAGGTC                              |
| 18                                               | SEQgpi-RVS        |                                                                                                                 | TGCTCTCGAAACTCGGTC                                |
| <b>Plasmid complementation of gtr29</b>          |                   |                                                                                                                 |                                                   |
| 19                                               | UPgtr29-ECORI-FWD | Buffer zone / EcoRI recognition sequence / Upstream region of gtr29 (primer 1)                                  | AGACAC / GAATTC / GCTTCTTCTCGTTCAATATATGG         |
| 20                                               | DWNgtr29-Sall-RVS | Buffer zone / Sall recognition sequence / Downstream region of gtr29 (primer 6)                                 | AGATCA / GTCGAC / GGAATTGACTTACTTGCTGGTAG         |
| 21                                               | pBAD19-MCS-FWD    | Confirmation of plasmid-complemented colonies                                                                   | GATTAGCGGATCCTACCTGACG                            |
| 22                                               | pBAD19-MCS-RVS    |                                                                                                                 | CACTTCTGAGTTCGGCATGG                              |
| <b>Plasmid complementation of gpi</b>            |                   |                                                                                                                 |                                                   |
| 23                                               | UPgpi-Sall-FWD    | Buffer zone / Sall recognition sequence / Upstream region of gpi (primer 11)                                    | AGATCA / GTCGAC / ACTATGCAAGAGCTGTTACGTCC         |
| 24                                               | DWNgpi-Sall-RVS   | Buffer zone / Sall recognition sequence / Downstream region of gpi (primer 14)                                  | AGATCA / GTCGAC / CAGCTATCCTTAAGCATATCTTC         |
| 25                                               | pBAD20-MCS-FWD    | Confirmation of plasmid-complemented colonies                                                                   | GATTAGCGGATCCTACCTGACG                            |
| 26                                               | pBAD20-MCS-RVS    |                                                                                                                 | CACTTCTGAGTTCGGCATGG                              |

865

866
